# Supplementary material for: Cpxm2 as a novel candidate for cardiac hypertrophy and failure in hypertension
Source: PubMed Central journal article supplement (PMC8766285; doi:10.1038/s41440-021-00826-8), 2021-12-16
Supplement: 41440_2021_826_MOESM3_ESM.pdf [file 41440_2021_826_MOESM3_ESM.pdf]

**Supplementary Table 2.** Microarray results F344 vs. SHRSP

The full data sets from microarray results are available via GEO accession number GSE154327.

| PROBE_ID       | SYMBOL                | ENTREZ_GENE_ID | logFC               | adj.P.Val       |
|----------------|-----------------------|----------------|---------------------|-----------------|
| 4120021        | RGD1565371_predicted* | 501140         | -4.818041851        | 4.61E-20        |
| 1190731        | Cct6a_predicted       | 288620         | -4.317422136        | 2.91E-25        |
| 1660403        | Mrpl18_predicted*     | 292244         | -4.314620497        | 1.75E-24        |
| 60576          | RGD1562905_predicted  | 292539         | -4.113679982        | 2.19E-23        |
| 2260064        | Myl7_predicted        | 289759         | -3.904835547        | 1.49E-12        |
| 6770563        | Ephx2                 | 65030          | -2.399684625        | 3.97E-16        |
| <b>2230576</b> | <b>Bnip3*</b>         | <b>84480</b>   | <b>-2.359720187</b> | <b>7.29E-12</b> |
| 4920575        | Adhfe1                | 362474         | -2.28606457         | 2.08E-16        |
| 2760022        | LOC311772             | 311772         | -2.257341856        | 8.78E-17        |
| 3610286        | Ccl5                  | 81780          | -2.116082102        | 2.67E-14        |
| 6620239        | Zfp364_predicted      | 362002         | -2.010160656        | 1.12E-13        |
| 580162         | Usmg5*                | 171069         | -1.987377681        | 5.08E-12        |
| 5340301        | RGD1563903_predicted  | 365613         | -1.963673951        | 1.54E-13        |
| 6760575        | Cds1                  | 81925          | -1.95673114         | 7.86E-17        |
| 1050746        | Rragd_predicted       | 297960         | -1.942494395        | 2.96E-18        |
| 4850500        | Hamp                  | 84604          | -1.774461672        | 0.006076878     |
| 6520132        | Nkg7                  | 171062         | -1.773935052        | 1.49E-12        |
| 520064         | RGD1310766_predicted  | 364147         | -1.745857148        | 2.19E-12        |
| 3360487        | Trh                   | 25569          | -1.691897452        | 0.014893719     |
| 3940494        | Lgmn                  | 63865          | -1.686915963        | 2.67E-14        |
| 6200541        | Ubd                   | 29168          | -1.592123398        | 1.44E-09        |
| 1740072        | C2                    | 24231          | -1.570744362        | 1.44E-10        |
| 2480403        | Gzma                  | 266708         | -1.544872826        | 3.20E-13        |
| 7100348        | Psmb8                 | 24968          | -1.457994008        | 9.68E-09        |
| 6400364        | RT1-Db1               | 294270         | -1.445958265        | 3.50E-09        |
| 1400736        | RGD1564247_predicted  | 499574         | -1.44203446         | 1.16E-16        |
| 460167         | LOC682869             | 682869         | -1.396881005        | 5.34E-08        |
| 430161         | Gzmc                  | 171290         | -1.393829755        | 2.51E-06        |
| 6770397        | Serpib6a              | 291085         | -1.279518754        | 1.73E-13        |
| 5570114        | Slpi                  | 84386          | -1.258114041        | 0.000128986     |
| 5670133        | LOC502009             | 502009         | -1.229693858        | 6.90E-07        |
| 7050270        | Rps18                 | 294282         | -1.210088678        | 2.40E-11        |
| 1090048        | RT1-A1                | 24973          | -1.192986648        | 1.15E-07        |
| 450397         | Cd63*                 | 29186          | -1.186659215        | 0.000256424     |
| 580239         | Picalm*               | 89816          | -1.154190124        | 1.24E-12        |
| 2570088        | Per2                  | 63840          | -1.153413061        | 0.002147244     |
| 3710025        | Cbx7                  | 362962         | -1.135445778        | 1.40E-09        |
| 3390025        | Dhx36_predicted       | 310461         | -1.107639198        | 5.40E-14        |
| 2260411        | Cd8a                  | 24930          | -1.092943229        | 1.41E-11        |
| 2680754        | RGD1563224_predicted  | 500874         | -1.08998019         | 4.92E-08        |
| 430278         | Rims1                 | 84556          | -1.07359358         | 1.35E-08        |
| 460494         | Acat1                 | 25014          | -1.072651946        | 2.51E-09        |
| 3120577        | Mrc1_predicted        | 291327         | -1.06267038         | 2.42E-05        |
| 1850022        | Polr2i_predicted*     | 292778         | -1.060830493        | 5.16E-13        |
| 2940500        | RGD1564936_predicted  | 361875         | -1.059250625        | 2.84E-12        |
| 4480671        | LOC361929             | 361929         | -1.05870798         | 1.20E-12        |
| 6900563        | Rhoj                  | 299145         | -1.058140421        | 2.18E-08        |
| 2760390        | LOC501744             | 501744         | -1.053536799        | 6.11E-07        |
| 6110020        | RGD1564247_predicted  | 499574         | -1.050298746        | 3.20E-12        |
| <b>510408</b>  | <b>Slc22a18*</b>      | <b>309131</b>  | <b>-1.048787287</b> | <b>1.28E-09</b> |
| 3610279        | Fhl2                  | 63839          | -1.041230195        | 3.58E-07        |
| 5670750        | Klkb1                 | 25048          | -1.040593587        | 4.08E-13        |
| 1400082        | Inha                  | 24504          | -1.027015304        | 0.000640108     |
| 4070138        | Zcchc9                | 309986         | -1.025817966        | 1.47E-10        |
| 5390022        | Wfdc1                 | 171112         | -1.025047436        | 2.50E-05        |

|         |                      |        |              |             |
|---------|----------------------|--------|--------------|-------------|
| 450270  | Akr1b10              | 296972 | -1.022786383 | 2.94E-06    |
| 4570142 | Ucp2*                | 54315  | -1.018752193 | 5.34E-09    |
| 6400253 | Mrpl48_predicted*    | 293149 | -1.011366999 | 3.85E-11    |
| 1580053 | LOC501015            | 501015 | -0.990100462 | 0.010359054 |
| 2510053 | Irx2                 | 306657 | -0.982539204 | 4.65E-06    |
| 4540487 | Ifi44                | 310969 | -0.976567718 | 4.40E-06    |
| 60520   | Lamc2                | 192362 | -0.975135888 | 3.28E-10    |
| 1980341 | Lancl1               | 114515 | -0.938507596 | 3.63E-10    |
| 4610273 | MGC72973*            | 361619 | -0.937815424 | 0.004220149 |
| 4730377 | Tnrc6_predicted      | 308971 | -0.934419977 | 1.11E-12    |
| 430100  | RGD1311381_predicted | 300870 | -0.923027857 | 0.000955541 |
| 3710278 | LOC290704            | 290704 | -0.922389369 | 0.000419143 |
| 580647  | Cxcl16               | 497942 | -0.914365898 | 2.48E-06    |
| 1820678 | Prf1                 | 50669  | -0.905319019 | 8.41E-08    |
| 5890411 | RT1-Da               | 294269 | -0.90229582  | 2.64E-05    |
| 2470440 | Rgs2                 | 84583  | -0.899812413 | 0.003547398 |
| 5690242 | Klre1                | 297645 | -0.895195238 | 4.23E-07    |
| 630010  | Lztr2                | 89868  | -0.886646603 | 0.000858813 |
| 3450349 | Becn1                | 114558 | -0.884923621 | 4.54E-12    |
| 6110288 | Klrd1                | 25110  | -0.863832836 | 1.25E-08    |
| 3610037 | RGD1303232           | 309381 | -0.862087573 | 1.65E-06    |
| 5390164 | Hdac2                | 84577  | -0.857905322 | 3.44E-09    |
| 6770079 | LOC501066            | 501066 | -0.857447592 | 4.55E-05    |
| 6100601 | Serpib6b             | 364705 | -0.856949026 | 2.10E-09    |
| 3610450 | LOC361172            | 361172 | -0.846235731 | 3.83E-07    |
| 610438  | Clic2                | 294141 | -0.846133846 | 2.34E-09    |
| 2060136 | RGD1305687_predicted | 287453 | -0.843678464 | 8.33E-11    |
| 1690446 | Gnpda2_predicted     | 289608 | -0.841222758 | 1.46E-12    |
| 2650064 | Gcgr                 | 24953  | -0.838244763 | 1.79E-05    |
| 510154  | Cd3g                 | 300678 | -0.835712747 | 1.33E-09    |
| 1170040 | Casq2                | 29209  | -0.834696761 | 4.73E-07    |
| 5690546 | Prmt5_predicted      | 364382 | -0.828805839 | 2.78E-07    |
| 770142  | Gcgr                 | 24953  | -0.825267058 | 0.000313724 |
| 1580446 | Tna_predicted        | 316099 | -0.824040203 | 4.02E-06    |
| 3130601 | Lbp                  | 29469  | -0.821841419 | 1.93E-05    |
| 4610402 | Uxt                  | 299313 | -0.821656876 | 3.10E-09    |
| 4570577 | Gzmk                 | 29165  | -0.820070229 | 2.11E-10    |
| 2340088 | RGD1562351_predicted | 499990 | -0.819929618 | 4.68E-10    |
| 1050465 | C4-2                 | 406161 | -0.805155519 | 0.001120302 |
| 6040671 | RGD1305020_predicted | 311575 | -0.803869305 | 1.45E-12    |
| 2030079 | Vldlr*               | 25696  | -0.798071286 | 0.000332983 |
| 7100603 | LOC310968            | 310968 | -0.79705978  | 1.22E-09    |
| 1340390 | Abca2                | 79248  | -0.794611891 | 5.74E-09    |
| 3360504 | Spsb1_predicted      | 313722 | -0.789155594 | 0.008018959 |
| 2640292 | Mgl1                 | 64195  | -0.782724102 | 3.14E-05    |
| 770193  | LOC498174            | 498174 | -0.781013281 | 1.42E-11    |
| 4230048 | RGD1564762_predicted | 313052 | -0.775927948 | 0.002254496 |
| 2260039 | Rsn                  | 65201  | -0.775694177 | 1.97E-07    |
| 7050097 | Dock11               | 313438 | -0.771102831 | 1.50E-07    |
| 630133  | RT1-M10-1            | 414787 | -0.765225388 | 5.03E-05    |
| 5390092 | LOC361990            | 361990 | -0.760575957 | 1.10E-10    |
| 360041  | Tgm1                 | 60335  | -0.760545851 | 0.044924244 |
| 5900463 | Ms4a4a_predicted     | 361734 | -0.759175428 | 0.007022235 |
| 5340148 | Ptpro                | 50677  | -0.758777368 | 4.02E-06    |
| 4570112 | Cml3                 | 113892 | -0.756902778 | 2.14E-10    |
| 4810020 | LOC305633            | 305633 | -0.754496294 | 2.04E-06    |
| 3360670 | Agl_predicted        | 362029 | -0.754297407 | 2.77E-09    |
| 3450500 | Bloc1s2*             | 293938 | -0.751434609 | 5.34E-09    |

|         |                      |        |              |             |
|---------|----------------------|--------|--------------|-------------|
| 5910215 | RGD1565715_predicted | 361149 | -0.750203646 | 1.77E-05    |
| 110309  | Smarca3_predicted    | 295568 | -0.749834146 | 2.39E-07    |
| 3140538 | Pom210               | 58958  | -0.74894468  | 1.69E-09    |
| 4480500 | Klf15                | 85497  | -0.745606029 | 0.000722195 |
| 2360100 | LOC310395            | 310395 | -0.736178822 | 0.000211587 |
| 5900039 | Ndufa10              | 314071 | -0.735283735 | 3.72E-08    |
| 770242  | Pex3                 | 83519  | -0.734818729 | 1.69E-09    |
| 2470672 | LOC302996            | 302996 | -0.733772091 | 1.12E-06    |
| 60184   | RT1-149              | 414784 | -0.721978259 | 5.13E-07    |
| 4670008 | Efnb3_predicted      | 360546 | -0.717278315 | 0.007085363 |
| 1660315 | Stat3                | 25125  | -0.712706654 | 0.003553638 |
| 3610156 | Fdx1                 | 29189  | -0.711988428 | 0.023778009 |
| 610113  | Ces3                 | 113902 | -0.710342625 | 0.001056562 |
| 3130609 | Wasl                 | 296936 | -0.710206458 | 9.30E-06    |
| 1660195 | Cacna2d1             | 25399  | -0.709927115 | 1.02E-08    |
| 6200154 | Crsp6                | 300367 | -0.709155751 | 3.35E-09    |
| 6840594 | RGD1562408_predicted | 501502 | -0.708209349 | 2.52E-07    |
| 840463  | Gnao                 | 50664  | -0.70786508  | 0.000680402 |
| 2570156 | Jak3                 | 25326  | -0.706169777 | 7.91E-05    |
| 5080372 | Hfe                  | 29199  | -0.70364269  | 3.80E-08    |
| 2510273 | Hla-dmb              | 294273 | -0.702104514 | 1.32E-05    |
| 4010154 | Igsf7                | 287813 | -0.699047614 | 1.19E-07    |
| 2470082 | RGD1310039           | 361747 | -0.698358271 | 1.01E-09    |
| 4060609 | Lsamp                | 29561  | -0.696434107 | 9.43E-06    |
| 2970364 | Bcl6_predicted       | 303836 | -0.695309135 | 0.014430139 |
| 6020180 | Plag1                | 297804 | -0.694302681 | 5.25E-08    |
| 3780402 | Cd7_predicted        | 303747 | -0.693915539 | 6.64E-07    |
| 3940039 | RGD1562920_predicted | 292486 | -0.689878782 | 1.04E-07    |
| 4540309 | Ptafr                | 58949  | -0.685403362 | 5.38E-10    |
| 5290609 | Ezh1_predicted       | 303547 | -0.685351027 | 0.001330554 |
| 5690524 | RGD1310724           | 360803 | -0.682472601 | 2.65E-06    |
| 2450746 | Ppp1r14c             | 171010 | -0.678190261 | 1.41E-05    |
| 4010168 | Irx4_predicted       | 306655 | -0.677292106 | 0.005208842 |
| 2850537 | Bok                  | 29884  | -0.672197803 | 5.90E-05    |
| 5670600 | Tcrg                 | 24821  | -0.66820356  | 2.81E-05    |
| 940484  | LOC498277            | 498277 | -0.663576028 | 5.94E-05    |
| 5220364 | Ifi271               | 170512 | -0.662848918 | 0.000172618 |
| 5340446 | RGD1562214_predicted | 500305 | -0.660235689 | 1.59E-05    |
| 7100408 | Fcgr3                | 116591 | -0.656795956 | 8.64E-10    |
| 2570280 | Rbm8_predicted       | 295284 | -0.656570446 | 1.05E-07    |
| 3060095 | RGD1560364_predicted | 363087 | -0.653473893 | 2.28E-10    |
| 6450129 | Slc16a1              | 25027  | -0.648635593 | 4.98E-06    |
| 5910202 | Hla-dma              | 294274 | -0.648303304 | 6.14E-06    |
| 6370181 | Abcb4                | 24891  | -0.646363406 | 1.87E-09    |
| 580563  | LOC499300            | 499300 | -0.642253296 | 1.71E-05    |
| 130091  | Coro1a               | 155151 | -0.638572963 | 1.99E-05    |
| 4070164 | Slc4a3               | 24781  | -0.638512492 | 0.000651215 |
| 2360093 | Aox1                 | 54349  | -0.638142056 | 5.02E-05    |
| 4590463 | Trp53i13_predicted   | 287550 | -0.636071622 | 9.12E-10    |
| 6550494 | Cirbp                | 81825  | -0.634952046 | 0.011614025 |
| 1240372 | Pycard               | 282817 | -0.634529399 | 0.000751743 |
| 1770504 | Cbr1                 | 29224  | -0.631827204 | 0.000989454 |
| 5720215 | Ifngr1               | 116465 | -0.626692622 | 0.001131277 |
| 5050100 | Drd4                 | 25432  | -0.625561571 | 0.008546366 |
| 1170451 | Vil2                 | 54319  | -0.62453514  | 6.17E-07    |
| 4810129 | Arhgap9              | 362893 | -0.622755683 | 8.05E-07    |
| 6760239 | Clns1a*              | 65160  | -0.620175951 | 5.53E-08    |
| 6020044 | MGC94190             | 288616 | -0.617341388 | 1.69E-05    |

|         |                      |        |              |             |
|---------|----------------------|--------|--------------|-------------|
| 1450204 | Eno1                 | 24333  | -0.615207119 | 1.49E-06    |
| 2760048 | RGD1304816_predicted | 362528 | -0.614518003 | 5.17E-08    |
| 1500170 | Ifi30                | 290644 | -0.612592122 | 3.96E-08    |
| 6380132 | Bcl11b_predicted     | 314423 | -0.603822743 | 1.57E-06    |
| 3170670 | Prr3                 | 361788 | -0.602980388 | 2.25E-06    |
| 2070605 | Gstm2                | 24424  | -0.597269393 | 0.006672361 |
| 610725  | Sema4a               | 310630 | -0.595768644 | 5.95E-05    |
| 5550279 | Hmox2                | 79239  | -0.592816451 | 5.81E-10    |
| 6840736 | Abr_predicted        | 287537 | -0.590870926 | 0.003877755 |
| 1500181 | RGD1311703           | 293160 | -0.589461737 | 6.28E-07    |
| 1450706 | C1qg                 | 362634 | -0.589339884 | 0.039450498 |
| 2030121 | Art5                 | 259167 | -0.588408987 | 0.000174568 |
| 1340736 | Itgad                | 64350  | -0.586403634 | 1.85E-06    |
| 7000403 | Argbp2               | 114901 | 4.25615964   | 6.82E-20    |
| 3990280 | Card9                | 64171  | 3.287536236  | 2.08E-17    |
| 1190487 | Ccdc53_predicted     | 299707 | 3.241095762  | 3.37E-21    |
| 5050170 | Nppa                 | 24602  | 2.721124887  | 1.09E-10    |
| 3290551 | Hmgn1                | 360704 | 2.608896753  | 4.61E-20    |
| 6660368 | LOC363865            | 363865 | 2.414392283  | 9.69E-18    |
| 6220377 | Acta1                | 29437  | 2.368028959  | 5.20E-10    |
| 3130670 | Mrpl17*              | 171061 | 2.350335606  | 1.12E-17    |
| 1190692 | Tcte1l               | 363448 | 2.116779373  | 8.07E-15    |
| 7000324 | Spp1                 | 25353  | 2.089790605  | 6.75E-05    |
| 2030685 | LOC497757            | 497757 | 1.824878062  | 1.19E-18    |
| 4480082 | Defb1                | 83687  | 1.822195675  | 4.73E-11    |
| 2570338 | LOC500733            | 500733 | 1.795350091  | 5.10E-13    |
| 4570731 | RGD1309065_predicted | 315179 | 1.775040857  | 9.44E-07    |
| 2450014 | RGD1562162_predicted | 366481 | 1.752221406  | 6.25E-14    |
| 940184  | Zadh1                | 299194 | 1.743595867  | 1.14E-17    |
| 5220138 | LOC362725            | 362725 | 1.729323877  | 2.90E-15    |
| 6840086 | Kcne1                | 25471  | 1.719144117  | 7.75E-06    |
| 7000332 | Atp6v1g2             | 368044 | 1.707708288  | 2.91E-11    |
| 1500768 | Nppb                 | 25105  | 1.675129807  | 1.74E-06    |
| 3830035 | Slc3a1               | 29484  | 1.634776701  | 6.57E-12    |
| 7040647 | Lcn2                 | 170496 | 1.616555289  | 0.007075062 |
| 6840593 | Atcay_predicted      | 362826 | 1.612655976  | 0.001591516 |
| 4780136 | LOC497685            | 497685 | 1.602150858  | 9.87E-14    |
| 3710504 | Anxa3                | 25291  | 1.592497358  | 2.18E-10    |
| 3290487 | Xylt1                | 64133  | 1.574630896  | 4.45E-13    |
| 2340079 | Aldh1a1*             | 24188  | 1.563667243  | 5.05E-11    |
| 1570390 | Atad2_predicted      | 314993 | 1.55685408   | 1.02E-09    |
| 60575   | Prl8a4               | 59088  | 1.493699929  | 1.01E-12    |
| 2690551 | LOC297481            | 297481 | 1.47555739   | 3.77E-13    |
| 2060014 | Tuba8                | 500377 | 1.467898034  | 0.000182461 |
| 1580408 | LOC683522            | 683522 | 1.447069542  | 5.88E-15    |
| 380072  | Tnn_predicted        | 304913 | 1.433617927  | 4.86E-15    |
| 4730402 | Trem2_predicted      | 301227 | 1.431840348  | 3.89E-09    |
| 3940053 | Csprs_predicted      | 316579 | 1.414242298  | 3.81E-13    |
| 940301  | LOC361990            | 361990 | 1.406503441  | 7.21E-13    |
| 3450600 | LOC499255            | 499255 | 1.390104448  | 1.41E-11    |
| 450112  | RGD1566241_predicted | 364381 | 1.389817233  | 7.25E-14    |
| 3440270 | LOC364343            | 364343 | 1.365878373  | 1.20E-12    |
| 3170341 | Serpinf1             | 287526 | 1.354368122  | 1.65E-12    |
| 6650397 | LOC499660            | 499660 | 1.352178868  | 2.91E-11    |
| 1780551 | RGD1560397_predicted | 360596 | 1.348153243  | 5.33E-14    |
| 2850546 | LOC689695            | 689695 | 1.345795875  | 4.54E-13    |
| 2510735 | RGD1564029_predicted | 499598 | 1.343025723  | 9.39E-12    |
| 2340377 | Olr1751_predicted    | 302825 | 1.340350015  | 9.20E-13    |

|                |                         |               |                    |                 |
|----------------|-------------------------|---------------|--------------------|-----------------|
| 6100053        | LOC499581               | 499581        | 1.337676661        | 5.33E-14        |
| 380563         | RGD1566178_predicted    | 364823        | 1.336997726        | 8.99E-11        |
| 670520         | LOC363701               | 363701        | 1.335267539        | 8.07E-11        |
| 460113         | LOC361140               | 361140        | 1.333219994        | 4.08E-13        |
| 3130035        | Mkks                    | 311456        | 1.328953834        | 9.25E-09        |
| 6180414        | Sema3f_predicted        | 315996        | 1.327630003        | 7.23E-11        |
| 4050619        | Irak1_predicted         | 363520        | 1.323982442        | 2.67E-14        |
| 4010161        | Hoxc4_mapped            | 24459         | 1.321626197        | 5.08E-12        |
| 6980082        | Mocs1_predicted         | 301221        | 1.312364006        | 3.90E-12        |
| 6450041        | Rps24                   | 81776         | 1.311455213        | 2.84E-12        |
| 4010095        | Asgr2                   | 29403         | 1.305066931        | 2.68E-10        |
| 1740577        | Dclre1b                 | 310745        | 1.292780999        | 3.10E-11        |
| 4480025        | Olr29_predicted         | 404896        | 1.292441202        | 1.54E-13        |
| 2640592        | RGD1311103_predicted    | 301100        | 1.285726927        | 9.39E-12        |
| 730017         | Dhdds                   | 298541        | 1.285204941        | 4.28E-09        |
| 3140500        | Slc30a2                 | 25362         | 1.266994455        | 2.70E-14        |
| 4060020        | Ttyh3_predicted         | 304315        | 1.258416862        | 5.90E-13        |
| 3390162        | Eml1                    | 362783        | 1.257427875        | 1.71E-12        |
| 2630341        | Smp2a                   | 24902         | 1.255607049        | 6.87E-14        |
| 6860167        | RGD1564674_predicted    | 499649        | 1.254198733        | 3.56E-09        |
| 2510390        | RGD1565435_predicted    | 502743        | 1.251114103        | 1.64E-12        |
| 4760379        | Abcg4                   | 300664        | 1.237877114        | 5.32E-12        |
| 6510722        | Flrt2_predicted         | 299236        | 1.234245001        | 2.67E-14        |
| 1570044        | Slc24a4_predicted       | 314396        | 1.230549122        | 1.33E-12        |
| 3450746        | Qscn6                   | 84491         | 1.226570176        | 0.000199063     |
| 1990138        | Olr677_predicted        | 405950        | 1.225648708        | 5.36E-12        |
| 1690091        | Thbs4                   | 29220         | 1.221344499        | 1.45E-05        |
| 1170184        | LOC503197               | 503197        | 1.216475112        | 5.79E-12        |
| <b>5570040</b> | <b>Cpxm2_predicted*</b> | <b>293566</b> | <b>1.216366362</b> | <b>1.19E-11</b> |
| 2190341        | RGD1307814_predicted    | 362559        | 1.213540566        | 2.42E-12        |
| 3450605        | Olr552_predicted        | 405943        | 1.213268249        | 4.21E-13        |
| 5360433        | Srd5a2                  | 64677         | 1.20557738         | 2.19E-07        |
| 6370082        | Indo                    | 66029         | 1.205541054        | 2.07E-10        |
| 5080333        | Rgs14                   | 114705        | 1.195464025        | 1.39E-13        |
| 2120064        | RGD1562963_predicted    | 498729        | 1.191833475        | 2.79E-13        |
| 4060053        | RGD1560462_predicted    | 365664        | 1.187927229        | 3.93E-14        |
| 4200670        | Prss8                   | 192107        | 1.180190929        | 1.32E-12        |
| 1450184        | Trim21_predicted        | 308901        | 1.179272725        | 8.12E-14        |
| 70270          | Cyr61                   | 83476         | 1.170539421        | 0.000333865     |
| 5690025        | Bphl                    | 361239        | 1.165389875        | 4.69E-13        |
| 2190739        | LOC499316               | 499316        | 1.160059659        | 3.84E-13        |
| 1170112        | RGD1564914_predicted    | 500616        | 1.149447202        | 1.15E-11        |
| 2360440        | Ms4a8b_predicted        | 361733        | 1.147055636        | 2.66E-12        |
| 4230102        | LOC499031               | 499031        | 1.144352745        | 1.44E-13        |
| 1230242        | Rpl3l_predicted         | 287122        | 1.137387421        | 3.65E-11        |
| 4480093        | Dscr1                   | 266766        | 1.134918443        | 6.98E-06        |
| 2570408        | Rab3d                   | 140665        | 1.130080747        | 2.11E-09        |
| 70176          | LOC303730               | 303730        | 1.126918194        | 1.28E-13        |
| 3990722        | Slit2                   | 360272        | 1.126438761        | 7.35E-11        |
| 5220402        | Mybph                   | 83708         | 1.123360366        | 1.03E-10        |
| 5890563        | Tcam1                   | 59305         | 1.122690263        | 4.92E-12        |
| 1990692        | LOC295015               | 295015        | 1.116206192        | 1.06E-11        |
| 1450592        | Myl6_predicted          | 362816        | 1.111057466        | 1.27E-09        |
| 2970368        | RGD1309310_predicted    | 303677        | 1.110278096        | 2.56E-12        |
| 4480288        | Pthr1_predicted         | 362113        | 1.100849701        | 5.36E-12        |
| 3130722        | Comt                    | 24267         | 1.095805329        | 1.62E-12        |
| 3170086        | Cdh19                   | 360835        | 1.09571499         | 1.15E-12        |
| 4050458        | RGD1561273_predicted    | 302093        | 1.094017578        | 3.57E-13        |

|         |                       |        |             |             |
|---------|-----------------------|--------|-------------|-------------|
| 610682  | Ccr7                  | 287673 | 1.093808852 | 7.01E-11    |
| 7100195 | LOC500675             | 500675 | 1.088647883 | 9.48E-11    |
| 2120364 | RGD1566007_predicted  | 367332 | 1.086053342 | 2.89E-12    |
| 4210333 | Olr1201_predicted     | 405106 | 1.084824901 | 2.58E-09    |
| 1740438 | Vnn1                  | 29142  | 1.080100553 | 5.90E-10    |
| 1500725 | LOC360997             | 360997 | 1.076857273 | 4.02E-06    |
| 870725  | Tas2r41               | 246219 | 1.074917644 | 1.72E-11    |
| 4810048 | RGD1563144_predicted  | 498486 | 1.073113493 | 1.08E-09    |
| 3060722 | Scand1_predicted      | 362252 | 1.068579381 | 1.27E-10    |
| 5890347 | RGD1559841_predicted  | 307816 | 1.064896029 | 1.15E-11    |
| 1410056 | Rps16*                | 140655 | 1.063694458 | 4.37E-12    |
| 1580070 | Cyp4a10               | 50549  | 1.061592583 | 5.10E-13    |
| 2810095 | RGD1559767_predicted  | 367806 | 1.0608392   | 1.64E-12    |
| 1090358 | Tfam                  | 83474  | 1.059974771 | 2.29E-15    |
| 6380403 | RGD1311530_predicted  | 300967 | 1.056052303 | 5.83E-05    |
| 6770594 | Mx2                   | 286918 | 1.051526507 | 0.000707766 |
| 4590019 | Hod                   | 171160 | 1.050880227 | 3.09E-07    |
| 360520  | LOC305332             | 305332 | 1.050475002 | 5.94E-10    |
| 5670647 | Slc38a4               | 170573 | 1.050143687 | 5.91E-12    |
| 1740673 | Spn                   | 24796  | 1.046656746 | 3.65E-12    |
| 6110725 | RGD1566402_predicted  | 500127 | 1.046114536 | 4.99E-11    |
| 2850161 | Olr1597_predicted     | 405222 | 1.043497754 | 1.93E-11    |
| 4200129 | LOC500033             | 500033 | 1.041702754 | 3.49E-09    |
| 1450070 | Pxmp4                 | 282634 | 1.041152664 | 5.36E-12    |
| 3450504 | LOC290864             | 290864 | 1.039541888 | 9.39E-12    |
| 1050008 | Cfh                   | 155012 | 1.037669636 | 4.22E-10    |
| 2940215 | Serpinh1              | 29345  | 1.0366745   | 2.72E-11    |
| 6650692 | Olr557_predicted      | 404871 | 1.035855777 | 3.66E-10    |
| 50270   | Npepps                | 50558  | 1.035091684 | 1.11E-11    |
| 5900040 | Ddah1                 | 64157  | 1.033973086 | 5.20E-09    |
| 4560170 | RGD1308048_predicted* | 298557 | 1.030461052 | 6.44E-08    |
| 2900707 | Trpv6                 | 114246 | 1.030378097 | 1.46E-09    |
| 3290603 | Usf2                  | 81817  | 1.025371608 | 1.06E-07    |
| 5550164 | Spred2_predicted      | 305539 | 1.02506152  | 1.06E-12    |
| 5290671 | Rage                  | 362787 | 1.020704528 | 5.11E-12    |
| 2810435 | Metap1_predicted      | 295500 | 1.009594305 | 9.43E-11    |
| 3170113 | LOC687424             | 687424 | 1.008948635 | 8.27E-11    |
| 4780451 | Ctnnd1_predicted      | 311163 | 1.008149088 | 1.40E-06    |
| 130358  | LOC362985             | 362985 | 1.007661095 | 3.28E-10    |
| 5860040 | Perq1_predicted       | 304378 | 1.00517979  | 4.32E-13    |
| 5050041 | RGD1562251_predicted  | 497906 | 1.001575486 | 2.81E-12    |
| 5290605 | RGD1564133_predicted  | 502612 | 0.998363053 | 5.54E-12    |
| 6200164 | LOC502536             | 502536 | 0.996722172 | 6.60E-12    |
| 2900162 | Lad1_predicted        | 313325 | 0.995519556 | 1.34E-07    |
| 6940181 | LOC501534             | 501534 | 0.994109439 | 5.33E-10    |
| 780300  | LOC288396             | 288396 | 0.986644244 | 1.70E-11    |
| 4150025 | Olr1340_predicted     | 300640 | 0.981773565 | 2.71E-12    |
| 1690239 | Enah                  | 360891 | 0.980342301 | 7.89E-08    |
| 3360102 | Lrrc42                | 298309 | 0.973229515 | 8.07E-11    |
| 1570167 | Tmprss7_predicted     | 288118 | 0.972318217 | 6.95E-15    |
| 4200592 | Ednrb                 | 50672  | 0.972088945 | 6.77E-07    |
| 1340441 | Olr1568_predicted     | 363826 | 0.971930853 | 2.65E-12    |
| 2970685 | RGD1306233_predicted  | 296608 | 0.97056966  | 5.26E-10    |
| 3290670 | LOC498899             | 498899 | 0.966777804 | 2.52E-13    |
| 1190465 | Drd2                  | 24318  | 0.963865741 | 3.71E-06    |
| 2850528 | LOC294726             | 294726 | 0.960696983 | 4.99E-11    |
| 3870433 | Lgals7                | 29518  | 0.954627728 | 3.76E-09    |
| 3120082 | ORF19                 | 367328 | 0.95283825  | 4.96E-12    |

|                |                         |               |                    |                 |
|----------------|-------------------------|---------------|--------------------|-----------------|
| 4760035        | Pla2g7                  | 301265        | 0.951120985        | 2.88E-06        |
| 7100403        | Hdac4_predicted         | 363287        | 0.947911459        | 2.03E-08        |
| 5910450        | Ccnd1                   | 58919         | 0.94652339         | 0.002401648     |
| 1230433        | LOC500046               | 500046        | 0.929549907        | 5.54E-12        |
| 50484          | RGD1560542_predicted    | 499847        | 0.927533117        | 1.57E-07        |
| 5220609        | RGD1563697_predicted    | 499353        | 0.925710261        | 4.00E-08        |
| 5270538        | Olrl690_predicted       | 294162        | 0.924338122        | 3.41E-10        |
| 70706          | Mta2                    | 361724        | 0.922545885        | 3.19E-11        |
| 1240711        | RGD1560110_predicted    | 366565        | 0.918827252        | 1.28E-10        |
| 3520711        | Rhcg                    | 293048        | 0.91524137         | 1.74E-06        |
| 4570184        | Pafah2                  | 313611        | 0.910145281        | 3.87E-12        |
| 5890592        | Birc6_predicted         | 313876        | 0.909417474        | 3.84E-08        |
| 5130280        | Fzd9                    | 266608        | 0.909064765        | 6.82E-07        |
| <b>4850673</b> | <b>RGD1304686*</b>      | <b>293673</b> | <b>0.908597237</b> | <b>4.08E-13</b> |
| 6660039        | Chek1                   | 140583        | 0.905491608        | 2.59E-10        |
| 1990136        | Chchd3_predicted        | 296966        | 0.902904502        | 5.34E-12        |
| 610731         | Pfn2                    | 81531         | 0.897668997        | 4.00E-05        |
| 5050164        | Dhx29_predicted         | 294741        | 0.893539577        | 1.72E-11        |
| 6100050        | Degs1                   | 58970         | 0.892674651        | 2.03E-08        |
| 2320746        | LOC362012               | 362012        | 0.889691418        | 3.80E-10        |
| 4920598        | Agtrl1                  | 83518         | 0.885502854        | 0.044924244     |
| 4590722        | Adcy5                   | 64532         | 0.883431603        | 5.46E-10        |
| 6020176        | Sytl2_predicted         | 361604        | 0.881889949        | 3.07E-09        |
| 540086         | Trim2                   | 361970        | 0.880816923        | 2.74E-10        |
| 1850546        | Ankrd23_predicted       | 316330        | 0.874752758        | 0.000235192     |
| 780605         | Them2_predicted         | 291135        | 0.868079832        | 4.59E-07        |
| 2650010        | RGD1306143_predicted    | 287110        | 0.866240023        | 3.98E-08        |
| 6650349        | Aqp9                    | 65054         | 0.859354182        | 1.54E-09        |
| 3290647        | RGD1565566_predicted    | 499057        | 0.851209603        | 4.33E-08        |
| 2570288        | Olrl818_predicted       | 405133        | 0.851094872        | 3.09E-10        |
| 6770053        | Col8a1_predicted        | 304021        | 0.84817078         | 7.31E-08        |
| 2760494        | LOC498268               | 498268        | 0.845057915        | 1.04E-07        |
| 940731         | Gramd1b_predicted       | 300644        | 0.844669703        | 1.60E-11        |
| 3990113        | Dhx9_predicted          | 304859        | 0.844587422        | 6.59E-06        |
| 2060100        | Fgf12                   | 170630        | 0.839298556        | 0.043727454     |
| 6180370        | S100a13_predicted       | 295213        | 0.838711838        | 9.05E-09        |
| 510433         | Ttc3_predicted          | 360702        | 0.831166349        | 3.84E-07        |
| 3290128        | Galnt13                 | 311039        | 0.830018329        | 4.52E-07        |
| 4120152        | Il17rb_predicted        | 306247        | 0.829435307        | 4.76E-10        |
| 3140095        | Npy                     | 24604         | 0.826212099        | 0.002515032     |
| 4120136        | RGD1561229_predicted    | 502492        | 0.825956121        | 1.75E-09        |
| 4540484        | MGC109194               | 500400        | 0.825280141        | 8.11E-11        |
| 520110         | LOC686988               | 686988        | 0.824954371        | 2.33E-10        |
| 4230673        | Bmp3                    | 25667         | 0.823429606        | 7.51E-11        |
| 4200014        | Ctla4                   | 63835         | 0.822630235        | 5.53E-09        |
| 5360647        | LOC299264               | 299264        | 0.821125733        | 5.17E-07        |
| 4730706        | Nsd1_predicted          | 306764        | 0.817058914        | 3.61E-09        |
| 6590497        | Pik3ap1_predicted*      | 294048        | 0.811603838        | 1.64E-05        |
| 460136         | Cd47                    | 29364         | 0.804416358        | 5.77E-07        |
| 6040603        | Nbn                     | 85482         | 0.799058694        | 3.06E-09        |
| 2100504        | Usp48                   | 362636        | 0.798861188        | 3.31E-07        |
| 5670019        | Acox2                   | 252898        | 0.796564185        | 2.21E-09        |
| 3990133        | Aer61                   | 494219        | 0.793992183        | 1.09E-09        |
| 6860735        | Tmem5                   | 299841        | 0.793877917        | 1.44E-10        |
| 5360092        | RGD1306959_predicted*   | 361624        | 0.793581277        | 0.001069814     |
| 870128         | LOC503070               | 503070        | 0.791089236        | 5.77E-08        |
| 6770204        | Gpc4                    | 317322        | 0.781419108        | 0.000406369     |
| <b>6900736</b> | <b>Tpcn2_predicted*</b> | <b>309139</b> | <b>0.781366381</b> | <b>2.95E-08</b> |

|         |                      |        |             |             |
|---------|----------------------|--------|-------------|-------------|
| 360309  | RGD1565165_predicted | 501604 | 0.781235149 | 2.20E-08    |
| 4610593 | Fbxo11               | 301674 | 0.780756344 | 4.36E-08    |
| 510286  | Plekha4              | 308584 | 0.77700709  | 5.00E-10    |
| 4760239 | Rtp4_predicted       | 360733 | 0.775287323 | 0.001230945 |
| 4050537 | RGD1563580_predicted | 500244 | 0.774370864 | 3.08E-11    |
| 2640070 | Btbd14a              | 296583 | 0.772746224 | 3.07E-09    |
| 2470129 | LOC304860            | 304860 | 0.772464721 | 5.52E-08    |
| 510735  | Slc1a3               | 29483  | 0.768436375 | 5.79E-06    |
| 3990239 | Mlc3                 | 56781  | 0.767204118 | 3.69E-10    |
| 1340066 | MGC72614             | 310540 | 0.767124816 | 4.40E-06    |
| 1090154 | Oas1k                | 494198 | 0.761517919 | 0.018476595 |
| 3440068 | RGD1309085_predicted | 297821 | 0.761197711 | 8.53E-08    |
| 5910441 | Znhit2_predicted     | 309177 | 0.761056916 | 4.03E-08    |
| 6860593 | LOC498786            | 498786 | 0.760305326 | 1.02E-09    |
| 380458  | LOC501280            | 501280 | 0.756988372 | 5.90E-10    |
| 730301  | RGD1563880_predicted | 503478 | 0.75521686  | 3.59E-09    |
| 5130164 | LOC502668            | 502668 | 0.75230009  | 4.85E-11    |
| 3870309 | Vdac3                | 83532  | 0.748674709 | 2.50E-10    |
| 1170463 | RGD1564295_predicted | 317585 | 0.743816028 | 2.31E-11    |
| 4920451 | Col4a2_predicted     | 306628 | 0.74169335  | 2.51E-09    |
| 3120671 | Ogt                  | 26295  | 0.735524516 | 6.13E-08    |
| 2030044 | RGD1309189_predicted | 310787 | 0.733269034 | 1.41E-08    |
| 5690519 | RGD1564924_predicted | 500267 | 0.731965498 | 0.000613341 |
| 1850368 | Cs                   | 170587 | 0.731591237 | 1.02E-07    |
| 1170494 | Kcnj8                | 25472  | 0.728923203 | 9.21E-11    |
| 6840170 | RGD1560514_predicted | 498757 | 0.726101256 | 8.75E-09    |
| 1580452 | RGD1564048_predicted | 499917 | 0.725900861 | 4.56E-08    |
| 7000136 | RGD1564089_predicted | 314304 | 0.724469207 | 6.18E-08    |
| 4070288 | Freq                 | 65153  | 0.723718318 | 3.76E-07    |
| 430170  | LOC501064            | 501064 | 0.723289564 | 4.08E-08    |
| 7050451 | Ing4                 | 297597 | 0.721127743 | 3.91E-11    |
| 460411  | Hexb                 | 294673 | 0.717939131 | 0.000283343 |
| 7040435 | Slc9a3*              | 24784  | 0.717619124 | 3.24E-05    |
| 7000068 | Csdc2                | 266600 | 0.715804332 | 0.003065751 |
| 4070670 | Gnb3                 | 60449  | 0.712925977 | 3.36E-08    |
| 6900035 | Igfbp3               | 24484  | 0.711843813 | 0.001981135 |
| 4810047 | LOC302210            | 302210 | 0.710223176 | 2.18E-08    |
| 7100131 | Ppm1a                | 24666  | 0.70757459  | 1.05E-09    |
| 4920278 | Lypla2*              | 83510  | 0.697798128 | 6.90E-11    |
| 5700592 | LOC687292            | 687292 | 0.69720367  | 3.07E-09    |
| 6900725 | LOC500297            | 500297 | 0.694825817 | 0.000781031 |
| 5700382 | RGD1560328_predicted | 499317 | 0.693680883 | 2.17E-09    |
| 3850504 | Lgals5               | 25475  | 0.691673569 | 3.00E-05    |
| 1770100 | Ccr3                 | 117027 | 0.690512997 | 3.21E-08    |
| 4540463 | Kcnmb2               | 294961 | 0.6866632   | 5.34E-08    |
| 1770338 | Cilp_predicted       | 315761 | 0.686079229 | 0.000126308 |
| 450079  | Socs7_predicted      | 287659 | 0.685048268 | 2.74E-07    |
| 6770132 | RGD1566120_predicted | 497904 | 0.681631632 | 1.49E-07    |
| 2100059 | Olr753_predicted     | 405237 | 0.680475537 | 4.28E-07    |
| 1580494 | Cd34_predicted       | 305081 | 0.679875955 | 1.33E-07    |
| 5670746 | Btnl8                | 406160 | 0.677330028 | 5.56E-10    |
| 6650131 | Pfkfb1               | 24638  | 0.672699091 | 0.00012236  |
| 3850324 | Trim14_predicted     | 313236 | 0.669824083 | 3.53E-08    |
| 6200452 | Lig4_predicted       | 290907 | 0.660736649 | 3.76E-09    |
| 450148  | RGD1311307           | 361238 | 0.655609815 | 0.015197414 |
| 3440040 | LOC316130            | 316130 | 0.655103565 | 0.001779342 |
| 1990369 | RGD1305283_predicted | 363162 | 0.654030665 | 3.10E-09    |
| 1500068 | Gda*                 | 83585  | 0.652976047 | 0.028895211 |



|         |                       |        |             |             |
|---------|-----------------------|--------|-------------|-------------|
| 4560278 | Pmm1                  | 300089 | 0.652253447 | 4.25E-08    |
| 870497  | RGD1309228            | 298851 | 0.651486301 | 1.48E-08    |
| 6100128 | Slc35e1_predicted     | 306328 | 0.651430693 | 2.25E-08    |
| 3130075 | Zmynd10               | 363139 | 0.646301305 | 7.66E-08    |
| 1580010 | Rab6b_predicted       | 363123 | 0.64180891  | 1.05E-08    |
| 430113  | Hspb3                 | 78951  | 0.64100089  | 1.84E-06    |
| 430128  | RGD1561042_predicted  | 498386 | 0.63884434  | 3.39E-07    |
| 2630129 | RGD1566029_predicted  | 500913 | 0.638274493 | 5.43E-10    |
| 5860075 | LOC681618             | 681618 | 0.637458524 | 1.26E-06    |
| 1570132 | Mx1                   | 24575  | 0.636320507 | 0.019535617 |
| 6420131 | Mgst3_predicted       | 289197 | 0.634711836 | 5.22E-07    |
| 6450025 | Prpf40a_predicted     | 295607 | 0.63329763  | 9.30E-06    |
| 1660685 | Gm2a                  | 282838 | 0.633190267 | 8.21E-11    |
| 4730725 | LOC297968             | 297968 | 0.630025814 | 3.97E-09    |
| 2370341 | Tbx15_predicted       | 295315 | 0.629456644 | 0.022886502 |
| 5360097 | Hebp1_predicted       | 362454 | 0.629309212 | 4.44E-10    |
| 2510092 | RGD1562402_predicted  | 499133 | 0.625579621 | 7.23E-06    |
| 4540095 | Crb3                  | 301112 | 0.624781154 | 6.33E-06    |
| 5860093 | Nudt7_predicted       | 361413 | 0.62239831  | 0.001020999 |
| 6550707 | Zbtb7b_predicted      | 295248 | 0.620574492 | 2.18E-08    |
| 1660735 | Blnk*                 | 499356 | 0.618978225 | 2.02E-10    |
| 4210204 | RGD1565969_predicted  | 361261 | 0.617309536 | 8.79E-09    |
| 6350110 | Zyx                   | 114636 | 0.617166188 | 2.06E-07    |
| 5340451 | Nedd1_predicted       | 299730 | 0.613868203 | 2.40E-07    |
| 2690605 | RGD1560559_predicted  | 303817 | 0.610430331 | 2.88E-09    |
| 1990471 | Igfbp7                | 289560 | 0.608756407 | 0.00040373  |
| 150520  | Mycn                  | 298894 | 0.608619058 | 0.00030805  |
| 1570671 | RGD1564507_predicted  | 363974 | 0.608114039 | 2.01E-07    |
| 4850010 | Yars2                 | 287924 | 0.608045863 | 0.001850105 |
| 580408  | Svil_predicted        | 361256 | 0.604509404 | 0.001872441 |
| 3190129 | RGD1564725_predicted  | 361174 | 0.604045147 | 5.00E-09    |
| 1090195 | LOC685888             | 685888 | 0.603408788 | 2.14E-06    |
| 60400   | RGD1560538_predicted  | 291844 | 0.602088777 | 6.92E-05    |
| 870022  | RGD1306000_predicted  | 363611 | 0.601462277 | 6.85E-08    |
| 3440041 | Tnnc2                 | 296369 | 0.601383746 | 2.49E-06    |
| 630333  | Tctex1                | 83462  | 0.598748543 | 1.01E-08    |
| 5130279 | Hrh3                  | 85268  | 0.592134894 | 5.12E-08    |
| 50731   | Cyp11a1               | 29680  | 0.587689479 | 0.001147393 |
| 6180451 | RGD1311783_predicted* | 294012 | 0.585369041 | 0.000602294 |

\* transcripts with differential expression between SHRSP and F344 as well as between SHRSP and consomic SHSRP-1<sup>F344</sup>; transcripts mapping within the LVH QTL interval on RNO1 between genetic markers D1Rat60 to D1Rat71 in bold
