# Supplementary material for: Cpxm2 as a novel candidate for cardiac hypertrophy and failure in hypertension
Source: PubMed Central journal article supplement (PMC8766285; doi:10.1038/s41440-021-00826-8), 2021-12-16
Supplement: 41440_2021_826_MOESM4_ESM.pdf [file 41440_2021_826_MOESM4_ESM.pdf]

**Supplementary Table 3.** Microarray results SHRSP vs. SHRSP-1<sup>F344</sup>

The full data sets from microarray results are available via GEO accession number GSE154327.

| PROBE_ID       | SYMBOL                        | RNO      | Position                   | ENTREZ_GENE_ID | logFC               | adj.P.Val       |
|----------------|-------------------------------|----------|----------------------------|----------------|---------------------|-----------------|
| 1990048        | Maoa                          | X        | 6554698-6620722            | 29253          | 0.626586829         | 0.012482078     |
| 580239         | Picalm*                       | 1        | 154377247-154458425        | 89816          | 1.195350238         | 6.71E-12        |
| 6760239        | Clns1a*                       | 1        | 162676269-162696544        | 65160          | 0.742225548         | 2.37E-08        |
| 4570142        | Ucp2*                         | 1        | 165506361-165512744        | 54315          | 0.90147734          | 5.99E-07        |
| 6400253        | Mrpl48_predicted*             | 1        | 165563788-165606375        | 293149         | 0.982335744         | 6.77E-10        |
| 6550528        | Art1_predicted                | 1        | 167202064-167206615        | 308873         | 0.659525519         | 0.004571152     |
| 4610273        | MGC72973*                     | 1        | 168945531-168953023        | 361619         | 1.910247366         | 3.01E-06        |
| 3140068        | Tpp1                          | 1        | 170588035-170594168        | 83534          | 0.731535661         | 1.26E-06        |
| 3130670        | Mrpl17*                       | 1        | 170652294-170653920        | 171061         | -2.289800604        | 4.79E-17        |
| 5360092        | RGD1306959_predicted (Akip1)* | 1        | 174330628-174339494        | 361624         | 0.673238632         | 0.037315182     |
| <b>5570040</b> | <b>Cpxm2_predicted*</b>       | <b>1</b> | <b>204048785-204161090</b> | <b>293566</b>  | <b>-0.876937203</b> | <b>6.50E-08</b> |
| <b>2230576</b> | <b>Bnip3*</b>                 | <b>1</b> | <b>211248098-211265282</b> | <b>84480</b>   | <b>1.871184919</b>  | <b>6.23E-09</b> |
| <b>510408</b>  | <b>Slc22a18*</b>              | <b>1</b> | <b>216677373-216700641</b> | <b>309131</b>  | <b>0.910133089</b>  | <b>2.09E-07</b> |
| <b>6900736</b> | <b>Tpcn2_predicted*</b>       | <b>1</b> | <b>218419182-218448902</b> | <b>309139</b>  | <b>-0.767678123</b> | <b>4.92E-07</b> |
| <b>4850673</b> | <b>RGD1304686 (Eif1ad)*</b>   | <b>1</b> | <b>220746387-220751687</b> | <b>293673</b>  | <b>-0.836379601</b> | <b>1.77E-11</b> |
| <b>2060035</b> | <b>Pola2</b>                  | <b>1</b> | <b>221273538-221321570</b> | <b>85242</b>   | <b>-0.89378895</b>  | <b>3.17E-05</b> |
| 2340079        | Aldh1a1*                      | 1        | 238222521-238264330        | 24188          | -0.817139572        | 5.13E-05        |
| 1500068        | Gda*                          | 1        | 238982392-239057732        | 83585          | -1.032856772        | 0.00382334      |
| 4810358        | Mamdc2                        | 1        | 241071110-241223798        | 309410         | 0.606849673         | 0.005810741     |
| 2030079        | Vldlr*                        | 1        | 245237736-245269205        | 25696          | 1.295438266         | 2.64E-06        |
| 1660735        | Blnk*                         | 1        | 260186967-260254600        | 499356         | -0.586928774        | 5.91E-09        |
| 6590497        | Pik3ap1_predicted*            | 1        | 260527344-260679132        | 294048         | -0.789243279        | 0.000227075     |
| 3450500        | Bloc1s2*                      | 1        | 263913854-263920962        | 293938         | 0.852116261         | 5.91E-09        |
| 6180451        | RGD1311783_predicted*         | 1        | 266451021-266464903        | 294012         | -0.774768042        | 0.000142357     |
| 580162         | Usmg5*                        | 1        | 266859961-266866753        | 171069         | 1.791045126         | 3.66E-10        |
| 7040435        | Slc9a3*                       | 1        | 31734327-31777070          | 24784          | -0.742864203        | 0.000182765     |
| 1660403        | Mrpl18_predicted*             | 1        | 48033531-48038726          | 292244         | 4.397582601         | 1.40E-24        |
| 1410056        | Rps16*                        | 1        | 85405512-85408444          | 140655         | -0.984339739        | 1.92E-10        |
| 1850022        | Polr2i_predicted*             | 1        | 88686812-88688249          | 292778         | 0.977903977         | 2.14E-11        |
| 2850368        | F3                            | 2        | 225310624-225322272        | 25584          | -0.777690497        | 0.037974465     |
| 6100722        | Edg7_predicted                | 2        | 252090634-252159221        | 360355         | -0.832269195        | 6.12E-07        |
| 780400         | Cited4                        | 5        | 139597731-139598622        | 114491         | 0.597870566         | 0.016338136     |
| 2570279        | Hmgcl                         | 5        | 154294806-154308640        | 79238          | -0.936428122        | 0.000129629     |
| 4920278        | Lypla2*                       | 5        | 154315033-154319629        | 83510          | -0.787870922        | 6.94E-11        |
| 4560170        | RGD1308048_predicted*         | 5        | 154322562-154333080        | 298557         | -0.642027071        | 0.000973133     |
| 1740014        | Cda_predicted                 | 5        | 156703579-156734541        | 362638         | 0.596336263         | 0.000302229     |
| 450397         | Cd63*                         | 7        | 3320103-3335582            | 29186          | -1.251620641        | 0.001181263     |
| 6420735        | Abra                          | 7        | 80792600-80796670          | 286965         | -0.986718581        | 0.014244553     |
| 4120021        | RGD1565371_predicted*         | 9        | 53616224-53617837          | 501140         | 4.326344936         | 9.79E-19        |
| 2360358        | Btg2                          | 13       | 50913180-50916982          | 29619          | -0.753912845        | 0.022335627     |
| 5700129        | LOC502176                     | 18       | 60745035-60767280          | 502176         | 0.727145794         | 0.002416997     |

\* transcripts with differential expression between SHRSP and F344 as well as between SHRSP and consomic SHSRP-1<sup>F344</sup>; transcripts mapping within the LVH QTL interval on RNO1 between genetic markers D1Rat60 to D1Rat71 in bold
