# Supplementary material for: Cpxm2 as a novel candidate for cardiac hypertrophy and failure in hypertension
Source: Hypertens Res. 2021 Dec 16;45(2):292–307. doi: 10.1038/s41440-021-00826-8 (PMC8766285; doi:10.1038/s41440-021-00826-8)
Supplement: Supplementary file 5 — Supplementary Table 4 [file 41440_2021_826_MOESM5_ESM.pdf]

Supplementary Table 4. Microarray results WT SHAM vs. WT DOCA  
The full data sets from microarray results are available via GEO accession number GSE154327

| ID       | Fold Change | FOR    | P-value | Gene Symbol                                   | Description                                                                                                                                                                                                        |
|----------|-------------|--------|---------|-----------------------------------------------|--------------------------------------------------------------------------------------------------------------------------------------------------------------------------------------------------------------------|
| 17505992 | -3.12       | 0.0052 |         | Znfx2c                                        | zinc finger, DHRG domain containing 2                                                                                                                                                                              |
| 17515777 | -3.09       | 0.0052 |         | Foxb1                                         | FXR1 domain-containing ion transport regulator 6                                                                                                                                                                   |
| 17466773 | -1.98       | 0.0052 |         | Ankrd1                                        | ankyrin repeat domain 1                                                                                                                                                                                            |
| 17211213 | -3.38       | 0.0052 |         | Arnt                                          | aryl hydrocarbon receptor 1                                                                                                                                                                                        |
| 17505925 | -2.12       | 0.0052 |         | Mmp10                                         | matrix metalloproteinase 2                                                                                                                                                                                         |
| 17221158 | -2.95       | 0.0052 |         | Mybl2                                         | myeloblastin oncogene-like 1                                                                                                                                                                                       |
| 17506004 | -12.95      | 0.0052 |         | Tnfrsf4                                       | tumor necrosis factor receptor 4                                                                                                                                                                                   |
| 17525904 | -2.27       | 0.0052 |         | Ctcf                                          | coiled-coil domain containing 80                                                                                                                                                                                   |
| 17461591 | -2.61       | 0.0052 |         | Dnak3                                         | deaf1 homolog 3 (Deaf1-like)                                                                                                                                                                                       |
| 17507919 | -8.58       | 0.0052 |         | Comp                                          | collagen oligomer, matrix protein                                                                                                                                                                                  |
| 17509722 | -1.93       | 0.0052 |         | Lysrtd1                                       | lysine receptor overexpressing transmembrane 1                                                                                                                                                                     |
| 17505290 | 2.13        | 0.0052 |         | Wnt3                                          | Wnt3 (wnt3 deficient) protein kinase 2                                                                                                                                                                             |
| 17505425 | -1.86       | 0.0052 |         | Pozz2c                                        | procollagen C-endopeptidase enhancer 2                                                                                                                                                                             |
| 17227628 | -2.87       | 0.0052 |         | Pfklr1a                                       | phospholipase A2, cytosolic (PLA2, calcium-dependent)                                                                                                                                                              |
| 17515594 | -1.77       | 0.0052 |         | Mybl2                                         | myeloblastin                                                                                                                                                                                                       |
| 17547719 | -2.34       | 0.0052 |         | Ankrd2                                        | ANKRD nucleoside 2                                                                                                                                                                                                 |
| 17567216 | -1.95       | 0.0052 |         | Pfz2c                                         | pleckstrin domain containing 2                                                                                                                                                                                     |
| 17387925 | -4.56       | 0.0052 |         | Frbz                                          | frizzled-related protein                                                                                                                                                                                           |
| 17507160 | -3.12       | 0.0052 |         | Arnt                                          | aryl hydrocarbon receptor 1                                                                                                                                                                                        |
| 17565233 | -1.95       | 0.0052 |         | Smc4                                          | structural maintenance of chromosomes 4                                                                                                                                                                            |
| 17505583 | -1.89       | 0.0052 |         | Cpne8                                         | copine VIII                                                                                                                                                                                                        |
| 17505469 | 2.83        | 0.0052 |         | Gm23733                                       | predicted gene, 23733 (Source MGI Symbol Acc: MGI5453516)                                                                                                                                                          |
| 17515955 | 4.85        | 0.0052 |         | Acta1                                         | actin, alpha 1, skeletal muscle                                                                                                                                                                                    |
| 17472192 | -2.15       | 0.0052 |         | Gdf15                                         | growth differentiation factor 15                                                                                                                                                                                   |
| 17515114 | -2.18       | 0.0052 |         | Gdf15                                         | growth differentiation factor 15                                                                                                                                                                                   |
| 17422732 | -1.81       | 0.0057 |         | Mpr8                                          | myeloid protein 8                                                                                                                                                                                                  |
| 17461811 | -1.95       | 0.0057 |         | Fam20c                                        | family with sequence similarity 48, member C                                                                                                                                                                       |
| 17280125 | -2.34       | 0.0057 |         | Pdcd3                                         | PD3 loop repeat containing                                                                                                                                                                                         |
| 17333558 | -2.43       | 0.0057 |         | Cd16                                          | CD16                                                                                                                                                                                                               |
| 17459423 | -2.82       | 0.0057 |         | Igkv6-23, Igkv4-4, kappa-VH, Igk-V21, Igk-V28 | immunoglobulin kappa chain variable 6-23, immunoglobulin kappa chain variable 3-4, immunoglobulin kappa chain variable 21 (V21), immunoglobulin kappa chain constant, immunoglobulin kappa chain variable 28 (V28) |
| 17222882 | -3.09       | 0.0057 |         | Psd4                                          | proteoglycan 4 (megakaryocyte stimulating factor, articular superficial zone protein)                                                                                                                              |
| 17433915 | -1.97       | 0.0057 |         | Mmp13                                         | matrix metalloproteinase 23                                                                                                                                                                                        |
| 17287170 | -2.11       | 0.0057 |         | Omd                                           | osteoinductin                                                                                                                                                                                                      |
| 17247253 | -1.73       | 0.0057 |         | Egr2                                          | erythrocyte band 3-related factor 2, alpha kinase 2                                                                                                                                                                |
| 17466345 | -2.6        | 0.0057 |         | Nurr1                                         | nuclear protein transcription regulator 1                                                                                                                                                                          |
| 17309452 | -1.75       | 0.0057 |         | Usp22                                         | Usp-glucosyl transferase 2                                                                                                                                                                                         |
| 17511999 | -1.76       | 0.0057 |         | Rim3                                          | RNA binding motif, single stranded interacting protein                                                                                                                                                             |
| 17481550 | -2.18       | 0.0057 |         | Ohit1                                         | ohit1 domain-like 1                                                                                                                                                                                                |
| 17505725 | -2.08       | 0.0057 |         | Pfz1                                          | pleckstrin domain growth factor receptor-like                                                                                                                                                                      |
| 17241731 | -1.95       | 0.0057 |         | Bcl11                                         | bcl11 domain 1 (phospholipase)                                                                                                                                                                                     |
| 1745578  | 2.09        | 0.0057 |         | Gm1                                           | glutathione S-transferase kappa 1                                                                                                                                                                                  |
| 17311551 | -3.21       | 0.0057 |         | Ccl14                                         | cellular, type XV, alpha 1                                                                                                                                                                                         |
| 17541492 | -2.03       | 0.0057 |         | 1500017E21Rk                                  | RKEN cDNA 1500017E21 gene                                                                                                                                                                                          |
| 17515122 | -14.23      | 0.0057 |         | Glt                                           | carboxylate intermediate, lysine, nucleoside monophosphate                                                                                                                                                         |
| 17287148 | -1.78       | 0.0057 |         | Ecm2                                          | extracellular matrix protein 2, female organ and adipocyte specific                                                                                                                                                |
| 17247948 | 3.24        | 0.0057 |         | Ecm2                                          | epidermal growth factor-containing fibulin-like extracellular matrix protein 1                                                                                                                                     |
| 17256389 | -1.9        | 0.0057 |         | Pm22                                          | perlecan matrix protein 2                                                                                                                                                                                          |
| 17505383 | 2.32        | 0.0057 |         | Gal3ec1                                       | galactose-3-O-sulfotransferase 3                                                                                                                                                                                   |
| 17505914 | -4.13       | 0.0057 |         | Mmp1                                          | matrix metalloproteinase 1                                                                                                                                                                                         |
| 17539611 | -2.02       | 0.0057 |         | Gm16                                          | glycoprotein m16                                                                                                                                                                                                   |
| 17334436 | 2.39        | 0.0057 |         | Rgl3                                          | ribosomal protein L3-like                                                                                                                                                                                          |
| 17245655 | -6.15       | 0.0057 |         | Gm2010                                        | predicted gene, 2010 (Source MGI Symbol Acc: MGI5453793)                                                                                                                                                           |
| 17505446 | 1.84        | 0.0057 |         | Gm2                                           | glutamic pyruvate transaminase (alanine aminotransferase) 2                                                                                                                                                        |
| 17221014 | -1.78       | 0.0057 |         | Cd34                                          | CD34 antigen                                                                                                                                                                                                       |
| 17464040 | 1.83        | 0.0057 |         | Pdca3                                         | phosphodiesterase 3A, cAMP inhibited                                                                                                                                                                               |
| 17272320 | 1.87        | 0.0057 |         | Zyve21                                        | zinc finger, FYVE domain containing 21                                                                                                                                                                             |
| 17254128 | 1.74        | 0.0057 |         | Usp4b                                         | Usp-4b domain B (C-degron)                                                                                                                                                                                         |
| 17318428 | 1.97        | 0.0057 |         | Opiin                                         | opioid receptor (ATP-hydrolyase)                                                                                                                                                                                   |
| 17432697 | 1.74        | 0.0057 |         | Wdr1                                          | WDR1 and tetrahydropteridine reductase                                                                                                                                                                             |
| 17284037 | 1.65        | 0.0057 |         | Mpc1-1, Mpc1-ps                               | mitochondrial pyruvate carrier 1, mitochondrial pyruvate carrier 1, pseudogene                                                                                                                                     |
| 17305881 | -1.83       | 0.0057 |         | Fyb                                           | FYN binding protein                                                                                                                                                                                                |
| 17305828 | -1.95       | 0.0057 |         | Ecm8                                          | erythrocyte band 3-related factor 8                                                                                                                                                                                |
| 17387032 | 1.75        | 0.0057 |         | Naf1                                          | NADH dehydrogenase (ubiquinone) F1-F0 subunit 8                                                                                                                                                                    |
| 17405486 | -1.96       | 0.0057 |         | Naf10                                         | immunoglobulin superfamily, member 10                                                                                                                                                                              |
| 17399176 | 2.12        | 0.0059 |         | 580047110Rk                                   | gon-4-like pseudogene                                                                                                                                                                                              |
| 17523639 | -1.89       | 0.0059 |         | Cd5                                           | chemokine (C-C motif) receptor 5                                                                                                                                                                                   |
| 17451549 | 2.13        | 0.0059 |         | Acyl-Coenzyme A dehydrogenase, short chain    | acyl-Coenzyme A dehydrogenase, short chain                                                                                                                                                                         |
| 17272877 | 1.98        | 0.0059 |         | Tbcl14b                                       | Tbcl1 domain family, member 16                                                                                                                                                                                     |
| 17505915 | -1.91       | 0.0059 |         | Tm3                                           | transmembrane protein 3                                                                                                                                                                                            |
| 17271244 | -1.54       | 0.0071 |         | Sclt6                                         | solute carrier family 18 (monocarboxylic acid transporters), member 6                                                                                                                                              |
| 17336229 | -1.86       | 0.0071 |         | Gm134, Btg3                                   | B-cell translocation gene 3 pseudogene, B cell translocation gene 3                                                                                                                                                |
| 17456393 | -1.85       | 0.0073 |         | Tmem178                                       | transmembrane protein, 178A                                                                                                                                                                                        |
| 17505609 | -2.34       | 0.0074 |         | Np1                                           | neuropilin 1                                                                                                                                                                                                       |
| 17387133 | -1.92       | 0.0074 |         | G44                                           | G44 antigen                                                                                                                                                                                                        |
| 17454264 | -1.85       | 0.0074 |         | Naa20a2                                       | N-acetylated alpha-linked acidic dipeptidase 2                                                                                                                                                                     |
| 17351634 | -1.81       | 0.0074 |         | Cd58                                          | coiled-coil domain containing 58                                                                                                                                                                                   |
| 17444970 | -1.91       | 0.0074 |         | Mead9                                         | membrane heptad repeat, independent oligonucleotide                                                                                                                                                                |
| 17505854 | -2.17       | 0.0074 |         | Gm1                                           | guanine nucleotide binding protein, alpha O                                                                                                                                                                        |
| 17514447 | -3.01       | 0.0074 |         | Cm13                                          | caspase 13                                                                                                                                                                                                         |
| 17364176 | -2.06       | 0.0074 |         | Ankrd1                                        | ankyrin repeat domain 1 (cardiac muscle)                                                                                                                                                                           |
| 17471716 | -2.2        | 0.0076 |         | Etfb                                          | electron transfer flavoprotein, beta polypeptide                                                                                                                                                                   |
| 17505922 | -2.06       | 0.0077 |         | Pd1m3                                         | PDZ and LIM domain 3                                                                                                                                                                                               |
| 17511693 | 3.99        | 0.0077 |         | Ces1d                                         | carboxylesterase 1D                                                                                                                                                                                                |
| 17468970 | -2.7        | 0.0077 |         | Lnc3                                          | lnc3, lnc3-like 3                                                                                                                                                                                                  |
| 17282570 | -3.96       | 0.0077 |         | Lbp2                                          | latent transforming growth factor beta binding protein 2                                                                                                                                                           |
| 17415390 | 1.69        | 0.0077 |         | Hadh                                          | hydroxyacyl-Coenzyme A dehydrogenase                                                                                                                                                                               |
| 17476725 | -2.09       | 0.0077 |         | Pc1                                           | protein regulator of cyclinlike 1                                                                                                                                                                                  |
| 17505624 | -2.75       | 0.0077 |         | Rbp1                                          | retinol binding protein 1, cellular                                                                                                                                                                                |
| 17524995 | -1.7        | 0.0077 |         | Actn                                          | actin, actin binding protein                                                                                                                                                                                       |
| 17257674 | -1.59       | 0.0077 |         | Pkar1a                                        | protein kinase, cAMP dependent regulatory, type I, alpha                                                                                                                                                           |
| 17277939 | 2.1         | 0.0077 |         | 930601000Rk, Gm3672                           | RKEN cDNA 930601000 gene, predicted gene, 3672                                                                                                                                                                     |
| 17505978 | -3.09       | 0.0077 |         | 25005520Rk                                    | RKEN cDNA 25005520 gene                                                                                                                                                                                            |
| 17227696 | -2.13       | 0.0077 |         | Glt                                           | complement component factor h                                                                                                                                                                                      |
| 17270524 | -1.68       | 0.0077 |         | Spr4c                                         | signal receptor partner 4C                                                                                                                                                                                         |
| 17384036 | 1.83        | 0.0077 |         | Fim2                                          | fat storage-inducing transmembrane protein 2                                                                                                                                                                       |
| 17356426 | 2.48        | 0.0077 |         | Scam17                                        | small GTPase-binding protein 17                                                                                                                                                                                    |
| 17461512 | 1.52        | 0.0077 |         | Ech1                                          | enoyl Coenzyme A hydratase, short chain, 1, mitochondrial                                                                                                                                                          |
| 17505705 | -2.27       | 0.0077 |         | Bmp4                                          | bone morphogenetic protein 4                                                                                                                                                                                       |
| 17462437 | -1.62       | 0.0077 |         | Usp18                                         | ubiquitin specific peptidase 18                                                                                                                                                                                    |
| 17248357 | -1.45       | 0.0077 |         | Gf3c3                                         | general transcription factor IIC, polypeptide 6, alpha                                                                                                                                                             |
| 17466163 | -1.83       | 0.0077 |         | Cmp2                                          | src family associated phosphoprotein 2                                                                                                                                                                             |
| 17337955 | 1.73        | 0.0077 |         | Mmp14                                         | matrix metalloproteinase 14                                                                                                                                                                                        |
| 17348136 | 1.85        | 0.0077 |         | Pfnd                                          | perlecan                                                                                                                                                                                                           |
| 17262157 | 1.81        | 0.0077 |         | Dnabp1                                        | dyshibin binding protein 1                                                                                                                                                                                         |
| 17222564 | 1.98        | 0.0077 |         | Snerb5                                        | small nuclear RNA, C/D box B9                                                                                                                                                                                      |
| 17505432 | 1.75        | 0.0077 |         | Maf1                                          | MAP1 homolog (S. cerevisiae)                                                                                                                                                                                       |
| 17313405 | 1.49        | 0.0077 |         | Maf1                                          | MAP1 homolog (S. cerevisiae)                                                                                                                                                                                       |
| 17373680 | -2.89       | 0.0078 |         | Pamr1 (Gm3681)                                | peptidase domain containing associated with muscle regeneration 1, predicted gene, 3681                                                                                                                            |
| 17274608 | -1.82       | 0.0078 |         | Ncapd                                         | non-SMC condensin I complex, subunit D2                                                                                                                                                                            |
| 17249623 | -1.51       | 0.0082 |         | Lap1                                          | low density lipoprotein receptor-related protein 1                                                                                                                                                                 |
| 17415973 | -1.7        | 0.0082 |         | Lamot                                         | leptin receptor overexpressing transcript                                                                                                                                                                          |
| 17495165 | -2.21       | 0.0082 |         | Atp5b                                         | ATP synthase, H+ transporting, mitochondrial F1 complex, subunit b                                                                                                                                                 |
| 17466530 | -1.64       | 0.0082 |         | Raf1b                                         | Raf1B (3) ubiquitin protein ligase                                                                                                                                                                                 |
| 17511290 | 1.86        | 0.0084 |         | Fncb3                                         | F box protein 31                                                                                                                                                                                                   |
| 17227536 | -1.67       | 0.0084 |         | Pnc6                                          | protein tyrosine phosphatase, receptor type, C                                                                                                                                                                     |
| 17424801 | 1.69        | 0.0084 |         | Smer25                                        | small nuclear RNA, C/D box B9                                                                                                                                                                                      |
| 17259015 | 1.82        | 0.0085 |         | Abp21                                         | ATP-binding cassette, sub-family A (ABC1), member 12                                                                                                                                                               |
| 17505900 | -1.84       | 0.0085 |         | Cd53                                          | CD53 antigen                                                                                                                                                                                                       |
| 17505838 | -1.51       | 0.0086 |         | Gk2b                                          | kinase family member 20B                                                                                                                                                                                           |
| 17481433 | -1.7        | 0.0086 |         | Mm142                                         | methyltetrahydrofolate dehydrogenase (NAD+ dependent), methyltetrahydrofolate cyclohydrolase                                                                                                                       |
| 17405953 | -3.28       | 0.0086 |         | Mmp2                                          | matrix metalloproteinase 2                                                                                                                                                                                         |
| 17505715 | 1.87        | 0.0086 |         | Gm16793                                       | predicted gene, 16793                                                                                                                                                                                              |
| 17479674 | -3.37       | 0.0086 |         | Nax4                                          | NADH1 oxidase 4                                                                                                                                                                                                    |
| 17414344 | -1.49       | 0.0086 |         | Eh4                                           | Eh4-like factor 4 (ret. domain transcription factor)                                                                                                                                                               |
| 17236404 | -2.04       | 0.0086 |         | Usp1                                          | Usp1 binding protein 1                                                                                                                                                                                             |
| 17512567 | 2.03        | 0.0086 |         | Glt                                           | glutamic pyruvate transaminase, soluble                                                                                                                                                                            |
| 17395164 | 2.02        | 0.0086 |         | Rh1                                           | Rh-like without CAUX 1                                                                                                                                                                                             |
| 17511188 | -2.25       | 0.0086 |         | Scf1                                          | scf1                                                                                                                                                                                                               |
| 17221077 | -1.97       | 0.0086 |         | Pnsp                                          | proline arginine-rich and leucine-rich repeat                                                                                                                                                                      |
| 17505454 | -2.45       | 0.0086 |         | Pfz2                                          | pleckstrin domain growth factor receptor-like                                                                                                                                                                      |
| 17505950 | -1.47       | 0.0086 |         | Enk2, Gm2, Gm21975                            | enkephalin 2, Gm2, Gm21975                                                                                                                                                                                         |
| 17487533 | 2.14        | 0.0086 |         | Vim110                                        | vimentin 110                                                                                                                                                                                                       |
| 17382222 | -1.75       | 0.0086 |         | Ankrd2                                        | ANKRD nucleoside 2                                                                                                                                                                                                 |
| 17483207 | 1.64        | 0.0086 |         | Gm1                                           | Gm1-binding kinase 1                                                                                                                                                                                               |
| 17305296 | 4.38        | 0.0086 |         | Rgl1                                          | integrin, beta-like 1                                                                                                                                                                                              |
| 17505959 | 1.67        | 0.0086 |         | Gm1494                                        | predicted gene, 1494                                                                                                                                                                                               |
| 17243416 | 1.89        | 0.0086 |         | B10Lha1e                                      | DNA segment, Chr 10, Johns Hopkins University B1 expressed                                                                                                                                                         |
| 17410410 | -1.85       | 0.0086 |         | Sarm2                                         | sphingosine synthase 2                                                                                                                                                                                             |
| 17207969 | -2.81       | 0.0086 |         | Acot                                          | acyl-CoA oxidase 1                                                                                                                                                                                                 |
| 17344864 | -1.83       | 0.0086 |         | Nax3                                          | neuron navigator 3                                                                                                                                                                                                 |
| 17335997 | 1.8         | 0.0086 |         | Scp4                                          | solute carrier family 18, member 3                                                                                                                                                                                 |
| 17505988 | -2.75       | 0.0086 |         | Slp1                                          | secreted frizzled-related protein 1                                                                                                                                                                                |
| 17376270 | 2.63        | 0.0086 |         | Sncr110                                       | small nuclear RNA, C/D box 110                                                                                                                                                                                     |
| 17215620 | 1.45        | 0.0086 |         | Cd11                                          | CD11 antigen                                                                                                                                                                                                       |
| 1734812  | 1.86        | 0.0086 |         | Dag2                                          | desmoglein 2                                                                                                                                                                                                       |
| 17256908 | -1.89       | 0.0086 |         | Cy2p                                          | cytochrome P-450 2C2                                                                                                                                                                                               |
| 17371374 | -1.46       | 0.0086 |         | Cer6                                          | ceramide synthase 6                                                                                                                                                                                                |
| 17287536 | -2.1        | 0.0086 |         | Tspan17                                       | tetraspanin 17                                                                                                                                                                                                     |
| 17331162 | -3.24       | 0.0086 |         | Ccl11                                         | cellular, type VII, alpha 1                                                                                                                                                                                        |
| 17505976 | 2.64        | 0.0091 |         | Scp4a2                                        | solute carrier family 25, member 42                                                                                                                                                                                |
| 17466178 | -1.77       | 0.0091 |         | Cd86                                          | coiled-coil domain containing 86A                                                                                                                                                                                  |
| 17548117 | 1.82        | 0.0093 |         | Gm293                                         | predicted pseudogene 293 (Source MGI Symbol Acc: MGI3649011)                                                                                                                                                       |
| 17527681 | -1.96       | 0.0093 |         | Irf1                                          | immunoglobulin superfamily containing leucine-rich repeat                                                                                                                                                          |
| 17285257 | -1.79       | 0.0093 |         | Cd110                                         | CD110 antigen                                                                                                                                                                                                      |
| 17327613 | -1.9        | 0.0093 |         | Nlr3                                          | NLR family, CARD domain containing 3                                                                                                                                                                               |
| 17341725 | 1.84        | 0.0093 |         | Nlr3                                          | NLR family, CARD domain containing 3                                                                                                                                                                               |
| 17334302 | 1.73        | 0.0093 |         | Snerb5, Raf2b2a                               | small nuclear RNA, C/D box 60 (Source MGI Symbol Acc: MGI5453206), RAB2, member RAS oncogene family, opposite strand (Source MGI Symbol Acc: MGI1022964)                                                           |
| 17373537 | 2.01        | 0.0093 |         | Maf1c3a                                       | microtubule-associated protein 1 light chain 3 alpha                                                                                                                                                               |
| 17304446 | -1.59       | 0.0093 |         | Maf1c3a                                       | protein kinase C, delta                                                                                                                                                                                            |
| 17429777 | 1.92        | 0.0095 |         | Adh4a1                                        | aldehyde dehydrogenase 4 family, member A1                                                                                                                                                                         |
| 17375456 | 1.65        | 0.0095 |         | Nom1                                          | neural origin domain modulator 1                                                                                                                                                                                   |
| 17231163 | -1.85       | 0.0095 |         | Ser1e4                                        | SERTA domain containing 4                                                                                                                                                                                          |
| 17216433 | -1.74       | 0.0095 |         | Am2                                           | absent in melanoma 2                                                                                                                                                                                               |
| 17265142 | -1.58       | 0.0095 |         | Dat                                           | domain tullein epimerase-like                                                                                                                                                                                      |
| 17505247 | 1.58        | 0.0095 |         | Rkb413                                        | leish repeat and BTB (POZ) domain containing 13                                                                                                                                                                    |
| 17543474 | 1.97        | 0.0095 |         | Rkb42                                         | leish repeat and BTB (POZ) domain containing 12                                                                                                                                                                    |
| 17504293 | 1.88        | 0.0095 |         | Mmp15                                         | matrix metalloproteinase 15                                                                                                                                                                                        |
| 17375237 | -1.86       | 0.0095 |         | Cancd                                         | cancer susceptibility candidate 4                                                                                                                                                                                  |
| 17279499 | 1.56        | 0.0095 |         | Cy2p                                          | cytochrome P-450 2C2                                                                                                                                                                                               |
| 17246674 | 1.67        | 0.0097 |         | Dusp18                                        | dual specificity phosphatase 18                                                                                                                                                                                    |
| 17255403 | 1.78        | 0.0097 |         | Mmp2                                          | matrix metalloproteinase 2                                                                                                                                                                                         |
| 17275069 | -1.91       | 0.0099 |         | Acme                                          | alkylglycerol monooxygenase                                                                                                                                                                                        |
| 17256287 | 1.77        | 0.0099 |         | Tmem84                                        | transmembrane protein 84                                                                                                                                                                                           |
| 17215199 | -1.58       | 0.0099 |         | Itih2                                         | interleukin 1 receptor-like 2                                                                                                                                                                                      |
| 17505408 | 1.6         | 0.0099 |         | Cat4                                          | carbonic anhydrase 4                                                                                                                                                                                               |
| 17505585 | -3.06       | 0.0099 |         | Vamp                                          | VAMP and immunoglobulin domain containing 4                                                                                                                                                                        |
| 17502233 | 2.79        | 0.0099 |         | Sca1a2                                        | solute carrier family 27 (fatty acid transporter), member 1                                                                                                                                                        |
| 17515064 | -1.93       | 0.0099 |         | Hau8                                          | Hau8 agmatine-like complex, subunit 8                                                                                                                                                                              |
| 17261096 | 2.24        | 0.0099 |         | Dna11                                         | dehydrogenase/oxidoreductase (SOR family) member 11                                                                                                                                                                |
| 17321768 | -1.76       | 0.0099 |         | Bn2                                           | binding integrator 2                                                                                                                                                                                               |
| 17505959 | -4.44       | 0.0101 |         | Ccl12a1                                       | cellular, type XII, alpha 1                                                                                                                                                                                        |
| 17295130 | -1.84       | 0.0103 |         | Fz                                            | coagulation factor II (thrombin) receptor                                                                                                                                                                          |
| 17480508 | -1.69       | 0.0104 |         | Gm329                                         | predicted gene 329 (Source MGI Symbol Acc: MGI5455269)                                                                                                                                                             |
| 17333644 | 1.78        | 0.0104 |         | Pnab3                                         | phenylalanine N-acyl transferase 3A, cAMP regulated                                                                                                                                                                |
| 17496217 | -1.52       | 0.0104 |         | Gm3                                           | guanine nucleotide binding protein (G protein), alpha inhibiting 3                                                                                                                                                 |
| 17517572 | -1.86       | 0.0105 |         | RAB2                                          | RAB2, member RAS oncogene family                                                                                                                                                                                   |
| 17434870 | -2.28       | 0.0105 |         | Znfx15                                        | zinc finger, DHRG domain containing 15                                                                                                                                                                             |
| 17301594 | -2.84       | 0.0105 |         | Sclt1                                         | stanniocalcin 1                                                                                                                                                                                                    |
| 17230523 | 1.61        | 0.0106 |         | Vdr18                                         | VDR domain 18                                                                                                                                                                                                      |
| 17453    |             |        |         |                                               |                                                                                                                                                                                                                    |

|          |       |        |                        |                                                                                                    |
|----------|-------|--------|------------------------|----------------------------------------------------------------------------------------------------|
| 17303407 | -2.2  | 0.0108 | Anxa1                  | annexin A1                                                                                         |
| 17303441 | 1.98  | 0.0108 | Ann12                  | aldehyde dehydrogenase 1 family, member 12                                                         |
| 17303590 | 2.12  | 0.0108 | Mvnt                   | myosin heavy chain associated RNA transcript                                                       |
| 17303517 | -1.55 | 0.0108 | Seppin1                | serpin (or cysteine) peptidase inhibitor, clade G, member 1                                        |
| 17303538 | 1.98  | 0.0108 | Vim                    | vimentin                                                                                           |
| 17303601 | -1.52 | 0.0109 | Zfp442_33000020Rik     | zinc finger protein 442, RIKEN cDNA 33000020R gene                                                 |
| 17374333 | -1.45 | 0.0109 | Nusap1                 | nucleolar and spindle associated protein 1                                                         |
| 17470560 | -1.81 | 0.011  | Apobc1                 | apolipoprotein B mRNA editing enzyme, catalytic polypeptide 1                                      |
| 17418168 | 1.95  | 0.011  | Nhs1a                  | 5-hydroxylase, cytosolic 1A                                                                        |
| 17310191 | 1.92  | 0.0111 | Nhs2                   | NAD kinase 5, mitochondrial                                                                        |
| 17236300 | -2.55 | 0.0113 | Tgfb2                  | transforming growth factor, beta 2                                                                 |
| 17401950 | 1.48  | 0.0114 | Cg14                   | cathepsin G-like 14                                                                                |
| 17236288 | -1.56 | 0.0115 | Igf1                   | insulin-like growth factor 1                                                                       |
| 17418494 | 1.66  | 0.0117 | Fncb3                  | Fibronectin type III domain containing 5                                                           |
| 17387197 | -3.37 | 0.0117 | Fbn                    | (in bud) initiation factor homolog (yeast)                                                         |
| 17466362 | 2.67  | 0.0117 | Klf15                  | Kruppel-like factor 15                                                                             |
| 17217035 | 1.58  | 0.0117 | Lef1                   | leucine                                                                                            |
| 1748312  | -1.77 | 0.0118 | Gab2                   | growth factor receptor bound protein 2-associated protein 2                                        |
| 17432976 | -3.4  | 0.0119 | Angptl                 | angiopoietin-like 1                                                                                |
| 17391575 | -7.86 | 0.0122 | Psmn                   | perlecan, osteoblast specific, factor                                                              |
| 17363650 | 1.95  | 0.0122 | Ugm1                   | ubiquitin-cytochrome c reductase, complex III subunit VII                                          |
| 17338895 | -1.43 | 0.0124 | Ctcf1                  | chloride channel, cationic 1                                                                       |
| 17355304 | -1.44 | 0.0126 | 4830503L19Rik          | RIKEN cDNA 4830503L, 19 gene                                                                       |
| 17433089 | -2.23 | 0.0126 | Fnl2                   | fibronogen-like protein 2                                                                          |
| 17466020 | 1.65  | 0.0126 | Ans                    | ATP-dependent transferase 5                                                                        |
| 17466511 | -1.54 | 0.0126 | Anxa2                  | annexin A2                                                                                         |
| 17401534 | -1.34 | 0.0126 | Mafk                   | antigen identified by monoclonal antibody Ki 67                                                    |
| 17464588 | -1.51 | 0.0126 | Sace                   | sarcosylase, epsilon                                                                               |
| 17396334 | -1.76 | 0.0126 | Sh3 domain protein D19 | SH3 domain protein D19                                                                             |
| 17434926 | -1.58 | 0.0126 | Pcdh17                 | protocadherin beta 17                                                                              |
| 17432296 | 1.9   | 0.0126 | Sctd3a2                | solute carrier family 25, member 34                                                                |
| 17541976 | 1.62  | 0.0126 | LOC101000036:Gm15963   | 40S ribosomal protein S21 pseudogene, predicted pseudogene 1603 [Source MGI Symbol Acc:MGI:364616] |
| 17541936 | 1.8   | 0.0126 | Ndufa1                 | NADH dehydrogenase (ubiquinone) 1 alpha subcomplex, 1                                              |
| 1736670  | -2.16 | 0.0126 | Ibb5                   | inter-alpha (globulin) inhibitor Ibb5                                                              |
| 17251916 | 1.16  | 0.0126 | Yaa2                   | yeast protein 2                                                                                    |
| 17319738 | -2.51 | 0.0128 | Ccl109                 | CD109 antigen                                                                                      |
| 17460236 | -2.92 | 0.0128 | LOC1010041003          | proteinase-activated receptor 1-like                                                               |
| 17448424 | -2.02 | 0.0128 | Gm15433                | predicted pseudogene 15433                                                                         |
| 17350655 | -1.67 | 0.0128 | Hes2l2                 | HELI1 domain containing 2                                                                          |
| 17417960 | -2.07 | 0.0128 | Kom2                   | potassium channel, subfamily 1, member 2                                                           |
| 17366566 | 1.7   | 0.0128 | Cgph1                  | cognate-like dehydrogenase-like                                                                    |
| 17302011 | -1.14 | 0.0128 | Akt3                   | lymphoma viral proto-oncogene 3                                                                    |
| 17397960 | 2.18  | 0.0129 | Mme                    | membrane metallo endopeptidase                                                                     |
| 17311994 | 1.62  | 0.0129 | Rps27l, Rps27          | ribosomal protein S27, retrovirus, ribosomal protein S27                                           |
| 17419171 | 1.59  | 0.0129 | Sncr1                  | small nuclear RNA, Cx3 box 61                                                                      |
| 17366512 | 1.88  | 0.0129 | Lama2                  | laminin, alpha 5                                                                                   |
| 1726975  | -1.49 | 0.0133 | Anxa8                  | annexin A8                                                                                         |
| 17366274 | 1.4   | 0.0133 | Ppm1l                  | protein phosphatase 1 (formerly 2C)-like                                                           |
| 17203695 | -1.18 | 0.0133 | Seppin1                | serpin (or cysteine) peptidase inhibitor, clade F, member 1                                        |
| 17335322 | 1.43  | 0.0133 | Rtn                    | retinol X receptor beta                                                                            |
| 17415677 | 1.65  | 0.0133 | Dyrk1b                 | dual-specificity tyrosine-TY phosphorylation regulated kinase 1b                                   |
| 17464235 | 1.55  | 0.0133 | Gm15543                | predicted gene 15543                                                                               |
| 17521966 | 1.41  | 0.0133 | Ucpac1                 | ubiquitin-cytochrome c reductase core protein 1                                                    |
| 17291275 | -1.49 | 0.0133 | Lnc11a                 | lincRNA non repeat containing 10A                                                                  |
| 17225659 | -1.53 | 0.0133 | Psm                    | perlecan, alpha-aminidase, monosaccharide                                                          |
| 17302161 | 1.54  | 0.0133 | Vwa8                   | von Willebrand factor A domain containing 8                                                        |
| 17314486 | 1.73  | 0.0133 | Su7                    | sarcosylase, epsilon                                                                               |
| 17504146 | 1.49  | 0.0133 | Cogp                   | cognate GQ homolog (yeast)                                                                         |
| 17367276 | -1.63 | 0.0134 | Pde3a                  | phosphodiesterase 3A, cAMP-dependent                                                               |
| 17305971 | 1.6   | 0.0134 | Mvnt                   | myosin, heavy polypeptide 1, cardiac muscle, beta                                                  |
| 17461433 | -1.47 | 0.0134 | Edm1                   | ER degradation enhancer, mannosidase-like alpha-1                                                  |
| 17365396 | 1.45  | 0.0134 | Rbm20                  | RNA binding motif protein 20                                                                       |
| 17218110 | 1.59  | 0.0138 | Rwg                    | retinoid X receptor gamma                                                                          |
| 17218623 | -2.71 | 0.0138 | Rbc                    | B cell leukemia/lymphoma 2                                                                         |
| 17219817 | 1.6   | 0.014  | Nhs2                   | neuroblastoma, suppressor of tumorigenesis 1                                                       |
| 17506206 | -1.64 | 0.014  | Crsad2                 | cysteine rich secretory protein LOC2, domain containing 2                                          |
| 17251811 | 1.63  | 0.014  | Acp2                   | acetyl-Coenzyme A acetyltransferase 2 (limb/hindlimb 3-exon) (Coenzyme A thioester)                |
| 17444609 | -1.32 | 0.014  | Cdk2                   | cyclin-dependent kinase-like 2 (CDK2-related kinase)                                               |
| 17306259 | 1.6   | 0.014  | Sirt6a1                | short chain dehydrogenase/reductase family 26A, member 1                                           |
| 17305323 | 1.53  | 0.014  | Ucp10                  | ubiquitin-cytochrome c reductase, complex III subunit X                                            |
| 17423005 | 1.44  | 0.014  | Uba2                   | ubiquitin A-52 residue ribosomal protein fusion product 1                                          |
| 17541728 | -1.38 | 0.014  | Pfkfb                  | phosphofructokinase, platelet                                                                      |
| 17269324 | -2.18 | 0.014  | Pfkfb                  | insulin-like growth factor binding protein 6                                                       |
| 17313305 | -1.73 | 0.014  | Irfp5                  | importin 13                                                                                        |
| 17258967 | 1.67  | 0.014  | Irfp5                  | LIP homolog, pseudogene 1                                                                          |
| 17545354 | -1.63 | 0.0141 | Lipr-ps1               | MUS-related GPR, member 14                                                                         |
| 17333301 | 2.46  | 0.0144 | Kom5                   | potassium inwardly rectifying channel, subfamily J, member 5                                       |
| 17525304 | 2.18  | 0.0144 | Cgph1                  | cognate-like dehydrogenase-like                                                                    |
| 17283633 | 1.61  | 0.0144 | Sirt6a1                | short chain dehydrogenase/reductase family 26A, member 1                                           |
| 17525304 | -1.48 | 0.0144 | Sirt6a1                | ubiquitin-cytochrome c reductase, complex III subunit X                                            |
| 17524166 | -1.93 | 0.0144 | Shn2                   | schlafen 2                                                                                         |
| 17281285 | -1.66 | 0.0144 | Cgph1                  | calcineurin receptor-like                                                                          |
| 17367536 | -1.84 | 0.0145 | Aphb1-lip              | amyloid beta (A4) precursor protein-binding, family B, member 1 interacting protein                |
| 17235713 | -2.13 | 0.0146 | Cgph1                  | enriched homolog (Drosophila)                                                                      |
| 17514424 | -1.9  | 0.0146 | Cgph1                  | calcineurin                                                                                        |
| 17501976 | 2.01  | 0.0146 | Iyua1                  | myo-inositol 1-phosphate synthase A1                                                               |
| 17218627 | -1.85 | 0.0146 | Lha                    | lipocalin-saccharide binding protein                                                               |
| 17410748 | -1.59 | 0.0147 | Palm5                  | PDZ and LIM domain 5                                                                               |
| 17545422 | 1.11  | 0.0147 | Gm15529                | predicted pseudogene 15529 [Source MGI Symbol Acc:MGI:3646788]                                     |
| 17506532 | 1.58  | 0.0147 | Wnk4                   | WNK tyrosine deficient protein kinase 4                                                            |
| 17473532 | -2.31 | 0.0147 | B3gnt8                 | UDP-GlcNAc 6-epimerase beta 1-3-N-acetylglucosaminyltransferase 9                                  |
| 17515337 | -1.65 | 0.0147 | Sirt6a1                | solute carrier family 50 (sugar transporter), member 1                                             |
| 17406975 | -1.43 | 0.0147 | Rbm1                   | Rib subunit protein 1                                                                              |
| 17317178 | -1.42 | 0.0147 | Rbm1                   | ribosomal protein 1                                                                                |
| 17385034 | -1.46 | 0.0147 | Rbm1                   | ribosomal protein 1                                                                                |
| 17352687 | -1.73 | 0.0147 | Nvst                   | myo-inositol 1-phosphate synthase A1                                                               |
| 17469776 | 1.43  | 0.0147 | Sirt6a1                | lipocalin-saccharide binding protein                                                               |
| 17469776 | 1.43  | 0.0147 | Sirt6a1                | PDZ and LIM domain 5                                                                               |
| 17545422 | 1.11  | 0.0147 | Gm15529                | predicted pseudogene 15529 [Source MGI Symbol Acc:MGI:3646788]                                     |
| 17506532 | 1.58  | 0.0147 | Wnk4                   | WNK tyrosine deficient protein kinase 4                                                            |
| 17473532 | -2.31 | 0.0147 | B3gnt8                 | UDP-GlcNAc 6-epimerase beta 1-3-N-acetylglucosaminyltransferase 9                                  |
| 17515337 | -1.65 | 0.0147 | Sirt6a1                | solute carrier family 50 (sugar transporter), member 1                                             |
| 17406975 | -1.43 | 0.0147 | Rbm1                   | Rib subunit protein 1                                                                              |
| 17317178 | -1.42 | 0.0147 | Rbm1                   | ribosomal protein 1                                                                                |
| 17385034 | -1.46 | 0.0147 | Rbm1                   | ribosomal protein 1                                                                                |
| 17352687 | -1.73 | 0.0147 | Nvst                   | myo-inositol 1-phosphate synthase A1                                                               |
| 17469776 | 1.43  | 0.0147 | Sirt6a1                | lipocalin-saccharide binding protein                                                               |
| 17469776 | 1.43  | 0.0147 | Sirt6a1                | PDZ and LIM domain 5                                                                               |
| 17545422 | 1.11  | 0.0147 | Gm15529                | predicted pseudogene 15529 [Source MGI Symbol Acc:MGI:3646788]                                     |
| 17506532 | 1.58  | 0.0147 | Wnk4                   | WNK tyrosine deficient protein kinase 4                                                            |
| 17473532 | -2.31 | 0.0147 | B3gnt8                 | UDP-GlcNAc 6-epimerase beta 1-3-N-acetylglucosaminyltransferase 9                                  |
| 17515337 | -1.65 | 0.0147 | Sirt6a1                | solute carrier family 50 (sugar transporter), member 1                                             |
| 17406975 | -1.43 | 0.0147 | Rbm1                   | Rib subunit protein 1                                                                              |
| 17317178 | -1.42 | 0.0147 | Rbm1                   | ribosomal protein 1                                                                                |
| 17385034 | -1.46 | 0.0147 | Rbm1                   | ribosomal protein 1                                                                                |
| 17352687 | -1.73 | 0.0147 | Nvst                   | myo-inositol 1-phosphate synthase A1                                                               |
| 17469776 | 1.43  | 0.0147 | Sirt6a1                | lipocalin-saccharide binding protein                                                               |
| 17469776 | 1.43  | 0.0147 | Sirt6a1                | PDZ and LIM domain 5                                                                               |
| 17545422 | 1.11  | 0.0147 | Gm15529                | predicted pseudogene 15529 [Source MGI Symbol Acc:MGI:3646788]                                     |
| 17506532 | 1.58  | 0.0147 | Wnk4                   | WNK tyrosine deficient protein kinase 4                                                            |
| 17473532 | -2.31 | 0.0147 | B3gnt8                 | UDP-GlcNAc 6-epimerase beta 1-3-N-acetylglucosaminyltransferase 9                                  |
| 17515337 | -1.65 | 0.0147 | Sirt6a1                | solute carrier family 50 (sugar transporter), member 1                                             |
| 17406975 | -1.43 | 0.0147 | Rbm1                   | Rib subunit protein 1                                                                              |
| 17317178 | -1.42 | 0.0147 | Rbm1                   | ribosomal protein 1                                                                                |
| 17385034 | -1.46 | 0.0147 | Rbm1                   | ribosomal protein 1                                                                                |
| 17352687 | -1.73 | 0.0147 | Nvst                   | myo-inositol 1-phosphate synthase A1                                                               |
| 17469776 | 1.43  | 0.0147 | Sirt6a1                | lipocalin-saccharide binding protein                                                               |
| 17469776 | 1.43  | 0.0147 | Sirt6a1                | PDZ and LIM domain 5                                                                               |
| 17545422 | 1.11  | 0.0147 | Gm15529                | predicted pseudogene 15529 [Source MGI Symbol Acc:MGI:3646788]                                     |
| 17506532 | 1.58  | 0.0147 | Wnk4                   | WNK tyrosine deficient protein kinase 4                                                            |
| 17473532 | -2.31 | 0.0147 | B3gnt8                 | UDP-GlcNAc 6-epimerase beta 1-3-N-acetylglucosaminyltransferase 9                                  |
| 17515337 | -1.65 | 0.0147 | Sirt6a1                | solute carrier family 50 (sugar transporter), member 1                                             |
| 17406975 | -1.43 | 0.0147 | Rbm1                   | Rib subunit protein 1                                                                              |
| 17317178 | -1.42 | 0.0147 | Rbm1                   | ribosomal protein 1                                                                                |
| 17385034 | -1.46 | 0.0147 | Rbm1                   | ribosomal protein 1                                                                                |
| 17352687 | -1.73 | 0.0147 | Nvst                   | myo-inositol 1-phosphate synthase A1                                                               |
| 17469776 | 1.43  | 0.0147 | Sirt6a1                | lipocalin-saccharide binding protein                                                               |
| 17469776 | 1.43  | 0.0147 | Sirt6a1                | PDZ and LIM domain 5                                                                               |
| 17545422 | 1.11  | 0.0147 | Gm15529                | predicted pseudogene 15529 [Source MGI Symbol Acc:MGI:3646788]                                     |
| 17506532 | 1.58  | 0.0147 | Wnk4                   | WNK tyrosine deficient protein kinase 4                                                            |
| 17473532 | -2.31 | 0.0147 | B3gnt8                 | UDP-GlcNAc 6-epimerase beta 1-3-N-acetylglucosaminyltransferase 9                                  |
| 17515337 | -1.65 | 0.0147 | Sirt6a1                | solute carrier family 50 (sugar transporter), member 1                                             |
| 17406975 | -1.43 | 0.0147 | Rbm1                   | Rib subunit protein 1                                                                              |
| 17317178 | -1.42 | 0.0147 | Rbm1                   | ribosomal protein 1                                                                                |
| 17385034 | -1.46 | 0.0147 | Rbm1                   | ribosomal protein 1                                                                                |
| 17352687 | -1.73 | 0.0147 | Nvst                   | myo-inositol 1-phosphate synthase A1                                                               |
| 17469776 | 1.43  | 0.0147 | Sirt6a1                | lipocalin-saccharide binding protein                                                               |
| 17469776 | 1.43  | 0.0147 | Sirt6a1                | PDZ and LIM domain 5                                                                               |
| 17545422 | 1.11  | 0.0147 | Gm15529                | predicted pseudogene 15529 [Source MGI Symbol Acc:MGI:3646788]                                     |
| 17506532 | 1.58  | 0.0147 | Wnk4                   | WNK tyrosine deficient protein kinase 4                                                            |
| 17473532 | -2.31 | 0.0147 | B3gnt8                 | UDP-GlcNAc 6-epimerase beta 1-3-N-acetylglucosaminyltransferase 9                                  |
| 17515337 | -1.65 | 0.0147 | Sirt6a1                | solute carrier family 50 (sugar transporter), member 1                                             |
| 17406975 | -1.43 | 0.0147 | Rbm1                   | Rib subunit protein 1                                                                              |
| 17317178 | -1.42 | 0.0147 | Rbm1                   | ribosomal protein 1                                                                                |
| 17385034 | -1.46 | 0.0147 | Rbm1                   | ribosomal protein 1                                                                                |
| 17352687 | -1.73 | 0.0147 | Nvst                   | myo-inositol 1-phosphate synthase A1                                                               |
| 17469776 | 1.43  | 0.0147 | Sirt6a1                | lipocalin-saccharide binding protein                                                               |
| 17469776 | 1.43  | 0.0147 | Sirt6a1                | PDZ and LIM domain 5                                                                               |
| 17545422 | 1.11  | 0.0147 | Gm15529                | predicted pseudogene 15529 [Source MGI Symbol Acc:MGI:3646788]                                     |
| 17506532 | 1.58  | 0.0147 | Wnk4                   | WNK tyrosine deficient protein kinase 4                                                            |
| 17473532 | -2.31 | 0.0147 | B3gnt8                 | UDP-GlcNAc 6-epimerase beta 1-3-N-acetylglucosaminyltransferase 9                                  |
| 17515337 | -1.65 | 0.0147 | Sirt6a1                | solute carrier family 50 (sugar transporter), member 1                                             |
| 17406975 | -1.43 | 0.0147 | Rbm1                   | Rib subunit protein 1                                                                              |
| 17317178 | -1.42 | 0.0147 | Rbm1                   | ribosomal protein 1                                                                                |
| 17385034 | -1.46 | 0.0147 | Rbm1                   | ribosomal protein 1                                                                                |
| 17352687 | -1.73 | 0.0147 | Nvst                   | myo-inositol 1-phosphate synthase A1                                                               |
| 17469776 | 1.43  | 0.0147 | Sirt6a1                | lipocalin-saccharide binding protein                                                               |
| 17469776 | 1.43  | 0.0147 | Sirt6a1                | PDZ and LIM domain 5                                                                               |
| 17545422 | 1.11  | 0.0147 | Gm15529                | predicted pseudogene 15529 [Source MGI Symbol Acc:MGI:3646788]                                     |
| 17506532 | 1.58  | 0.0147 | Wnk4                   | WNK tyrosine deficient protein kinase 4                                                            |
| 17473532 | -2.31 | 0.0147 | B3gnt8                 | UDP-GlcNAc 6-epimerase beta 1-3-N-acetylglucosaminyltransferase 9                                  |
| 17515337 | -1.65 | 0.0147 | Sirt6a1                | solute carrier family 50 (sugar transporter), member 1                                             |
| 17406975 | -1.43 | 0.0147 | Rbm1                   | Rib subunit protein 1                                                                              |
| 17317178 | -1.42 | 0.0147 | Rbm1                   | ribosomal protein 1                                                                                |
| 17385034 | -1.46 | 0.0147 | Rbm1                   | ribosomal protein 1                                                                                |
| 17352687 | -1.73 | 0.0147 | Nvst                   | myo-inositol 1-phosphate synthase A1                                                               |
| 17469776 | 1.43  | 0.0147 | Sirt6a1                | lipocalin-saccharide binding protein                                                               |
| 17469776 | 1.43  | 0.0147 | Sirt6a1                | PDZ and LIM domain 5                                                                               |
| 17545422 | 1.11  | 0.0147 | Gm15529                | predicted pseudogene 15529 [Source MGI Symbol Acc:MGI:3646788]                                     |
| 17506532 | 1.58  | 0.0147 | Wnk4                   | WNK tyrosine deficient protein kinase 4                                                            |
| 17473532 | -2.31 | 0.0147 | B3gnt8                 | UDP-GlcNAc 6-epimerase beta 1-3-N-acetylglucosaminyltransferase 9                                  |
| 17515337 | -1.65 | 0.0147 | Sirt6a1                | solute carrier family 50 (sugar transporter), member 1                                             |
| 17406975 | -1.43 | 0.0147 | Rbm1                   | Rib subunit protein 1                                                                              |
| 17317178 | -1.42 | 0.0147 | Rbm1                   | ribosomal protein 1                                                                                |
| 17385034 | -1.46 | 0.0147 | Rbm1                   | ribosomal protein 1                                                                                |
| 17352687 | -1.73 | 0.0147 | Nvst                   | myo-inositol 1-phosphate synthase A1                                                               |
| 17469776 | 1.43  | 0.0147 | Sirt6a1                | lipocalin-saccharide binding protein                                                               |
| 17469776 | 1.43  | 0.0147 | Sirt6a1                | PDZ and LIM domain 5                                                                               |
| 17545422 | 1.11  | 0.0147 | Gm15529                | predicted pseudogene 15529 [Source MGI Symbol Acc:MGI:3646788]                                     |
| 17506532 | 1.58  | 0.0147 | Wnk4                   | WNK tyrosine deficient protein kinase 4                                                            |
| 17473532 | -2.31 | 0.0147 | B3gnt8                 | UDP-GlcNAc 6-epimerase beta 1-3-N-acetylglucosaminyltransferase 9                                  |
| 17515337 | -1.65 | 0.0147 | Sirt6a1                | solute carrier family 50 (sugar transporter), member 1                                             |
| 17406975 | -1.43 | 0.0147 | Rbm1                   | Rib subunit protein 1                                                                              |
| 17317178 | -1.42 | 0.0147 | Rbm1                   | ribosomal protein 1                                                                                |
| 17385034 | -1.46 | 0.0147 | Rbm1                   | ribosomal protein 1                                                                                |
| 17352687 | -1.73 | 0.0147 | Nvst                   | myo-inositol 1-phosphate synthase A1                                                               |
| 17469776 | 1.43  | 0.0147 | Sirt6a1                | lip                                                                                                |

|          |       |       |                    |                                                                                                                  |
|----------|-------|-------|--------------------|------------------------------------------------------------------------------------------------------------------|
| 1743697  | 1.37  | 0.018 | Lam2               | LSM homolog, US small nuclear RNA associated (S. cerevisiae)                                                     |
| 1743697  | 1.7   | 0.081 | Ablm2              | actin-binding LM protein 2                                                                                       |
| 1739641  | -1.68 | 0.051 | Ablg1a1            | Rho GTPase activating protein 1A                                                                                 |
| 1740112  | -4.3  | 0.011 | Sp11a              | small protein-rich protein 1A                                                                                    |
| 1725650  | -1.06 | 0.081 | Ccr2               | chemokine (C-C motif) receptor 2                                                                                 |
| 1726070  | -1.61 | 0.008 | Gm2408             | predicted gene 2408 [Source MGI Symbol: MGI:5454360]                                                             |
| 1749539  | -1.59 | 0.083 | Igfb1              | immunoglobulin superfamily, member 6                                                                             |
| 1727434  | -1.18 | 0.033 |                    |                                                                                                                  |
| 1736501  | -1.19 | 0.033 | LOC101056572       | muscle body protein SP140-like                                                                                   |
| 1742656  | 1.71  | 0.043 | Nkx-5              | NKX homeobox 5                                                                                                   |
| 1742130  | 1.62  | 0.043 | Ltdk3              | protein pseudogene 483                                                                                           |
| 1747684  | -1.63 | 0.033 | Ltd2               | LM domain binding 2                                                                                              |
| 1745538  | 2.48  | 0.043 | Kom2               | potassium voltage-gated channel, related family, member 2                                                        |
| 1734489  | -1.44 | 0.033 | Arp5               | arbitrator 5                                                                                                     |
| 1743489  | 1.89  | 0.043 | Retf20             | retinoid factor protein 20                                                                                       |
| 1725707  | 1.45  | 0.033 | Chn                | clustered mitochondria (chAC111) homolog                                                                         |
| 1725829  | 1.46  | 0.033 | Obal1              | obscure-like 1                                                                                                   |
| 1725642  | 1.07  | 0.043 | Genm4              | sema domain, immunoglobulin domain (Ig), transmembrane domain (TM) and short cytoplasmic domain, (semaphorin) 4D |
| 1729799  | 1.49  | 0.033 | Atx11              | Atx11, predicted gene 2260, predicted gene 2274                                                                  |
| 1729301  | 1.39  | 0.035 | Lvt1               | LTV homolog (S. cerevisiae)                                                                                      |
| 1725511  | -1.38 | 0.036 | Cen192             | centromeric protein 192                                                                                          |
| 17254769 | 2.36  | 0.086 | Elnb3              | elphin B3                                                                                                        |
| 1726477  | 1.61  | 0.036 | Mmp24              | matrix metalloproteinase 24                                                                                      |
| 1731506  | -1.91 | 0.036 | Arlg3p3            | ADP-ribosylation factor GTPase activating protein 3                                                              |
| 1729533  | 1.38  | 0.037 | Eoz2               | enoyl-Coenzyme A delta isomerase 2                                                                               |
| 1746563  | 1.92  | 0.037 | Shc2               | SH3-domain domain kinase family, member 2                                                                        |
| 1737614  | -2.04 | 0.037 | Wisp2              | WNT1 inducible signaling pathway protein 2                                                                       |
| 1726477  | -2.15 | 0.037 | Pym1e              | protein phosphatase 1E (PP2C domain containing)                                                                  |
| 1732528  | -3.92 | 0.037 | Ram1               | regulator of calcineurin 1                                                                                       |
| 1737168  | -1.06 | 0.037 | Lsp1               | lymphocyte cytosolic protein 1                                                                                   |
| 1744015  | 1.46  | 0.037 | Fark5              | Farnesylated serine/threonine kinase                                                                             |
| 17359116 | -1.34 | 0.037 | Csaw2              | colicoid serum rich 2                                                                                            |
| 1741202  | 1.37  | 0.037 | Slu1               | GCN1 general control of amino acid synthesis 1-like 1 (yeast)                                                    |
| 1735038  | -1.04 | 0.037 | Slu1               | GCN1 general control of amino acid synthesis 1-like 1 (yeast)                                                    |
| 1724113  | 2.58  | 0.037 | Gen13              | leucine rich repeat and Ig domain containing 13                                                                  |
| 1742410  | 1.44  | 0.037 | Hdc1               | cell factor C1                                                                                                   |
| 1740375  | -2.07 | 0.037 | Cla5               | calpain 5                                                                                                        |
| 1721927  | 1.48  | 0.037 | Rpl1               | ribosomal protein large, R1                                                                                      |
| 1730525  | -1.41 | 0.037 | Frd3a              | fructose type II domain containing 3A                                                                            |
| 17250193 | 1.83  | 0.039 | Gen10435           | predicted gene 10435 [Source MGI Symbol: MGI:3642620], uncharacterized LOC105244175                              |
| 1725558  | 1.4   | 0.039 | Ubr1               | ubiquitin                                                                                                        |
| 1726222  | -1.64 | 0.039 | Cd55               | CD55 molecule, decay accelerating factor for complement                                                          |
| 1740592  | 1.97  | 0.039 | Hsp2               | hemostatic protein 2, domain 1 (human homolog)                                                                   |
| 1721185  | -1.01 | 0.039 | Elt1               | interleukin 1 receptor, type I                                                                                   |
| 1739476  | 1.76  | 0.039 | Gen1426            | predicted gene 1426 [Source MGI Symbol: MGI:364851]                                                              |
| 1740192  | 1.97  | 0.039 | Bach2              | branched chain leucine dehydrogenase (E1, alpha polypeptide)                                                     |
| 1730634  | -1.48 | 0.039 | Sic7a7             | solute carrier family 7 (anionic amino acid transporter, y+ system), member 7                                    |
| 1731038  | 1.89  | 0.039 | Fgf18              | fibroblast growth factor 18                                                                                      |
| 1737180  | -1.41 | 0.039 | Sh3bpl             | SH3-binding domain, glutamic acid-rich protein like                                                              |
| 1735508  | -1.71 | 0.039 | Bgn                | biglycan                                                                                                         |
| 1746438  | 1.59  | 0.039 | Nduaf4             | NADH dehydrogenase subunit 4, mitochondrial, alpha subunit, 4                                                    |
| 1728812  | 2.12  | 0.039 | 20101110718: M2-21 | KREN cDNA 2011107181 gene, Nucleoside 24-1                                                                       |
| 1743106  | -1.48 | 0.039 | Fam11421           | family with sequence similarity 114, member A1                                                                   |
| 1731410  | 1.48  | 0.039 | Sh3adly1           | SH3adly1 domain gene 3                                                                                           |
| 17444713 | -1.51 | 0.039 | Cd8b               | cytochrome-dependent kinase B                                                                                    |
| 1746019  | 1.65  | 0.039 | Vmnor2             | vimentin 2, receptor 32                                                                                          |
| 1724717  | -1.62 | 0.039 | Col1a1             | collagen, type I, alpha 1                                                                                        |
| 1745854  | -1.73 | 0.039 | Tru1               | transmembrane protein 1                                                                                          |
| 1725509  | -1.56 | 0.039 | Elm1               | enoplamin and cell motility 1                                                                                    |
| 1729578  | -1.65 | 0.039 | Hspb               | heparanase B                                                                                                     |
| 1735118  | -1.47 | 0.039 | Tmem2              | transmembrane protein 2                                                                                          |
| 1735674  | 1.52  | 0.039 | Phm                | phosphatidylcholine transferase                                                                                  |
| 1721703  | 1.38  | 0.039 | Scp3a9             | scap3a9                                                                                                          |
| 1738319  | 1.9   | 0.039 | Fam18a             | family with sequence similarity 178, member A                                                                    |
| 17436246 | -1.39 | 0.039 | Pdgfra             | platelet derived growth factor receptor, alpha polypeptide                                                       |
| 1743424  | 1.33  | 0.039 | Gen13006           | predicted gene 13006 [Source MGI Symbol: MGI:364851], predicted gene 2506                                        |
| 1730614  | 1.34  | 0.039 | Psob               | protoporphyrinogen oxidase, beta polypeptide                                                                     |
| 1721038  | -2.1  | 0.039 | Serpinb1           | serpin (or cysteine) proteinase inhibitor, class A, member 3N                                                    |
| 1745268  | 1.68  | 0.039 | Cox1a1             |                                                                                                                  |

[illegible]

|          |       |        |                          |                                                                                                                                    |
|----------|-------|--------|--------------------------|------------------------------------------------------------------------------------------------------------------------------------|
| 1732679  | 1.38  | 0.0316 | Dnae2                    | DGeorge syndrome critical region gene 2                                                                                            |
| 1738177  | 1.4   | 0.0316 | Nr1h3                    | nuclear receptor subfamily 1, group 3, member 3                                                                                    |
| 17361056 | 1.47  | 0.0316 | Nduaf1                   | NADH dehydrogenase (ubiquinone) flavoprotein 1                                                                                     |
| 1733262  | 1.53  | 0.0316 | Opa                      | capsule-specific mitochondrial matrix peptidase proteolytic subunit                                                                |
| 1744332  | -1.59 | 0.0316 | Prp42b                   | predicted gene, 4112 [Source: MGI Symbol Acc: MGI:443368]                                                                          |
| 1742773  | 1.53  | 0.0316 | Pgr2                     | polymerase (RNA) II (DNA directed) polypeptide E                                                                                   |
| 173532   | -1.72 | 0.0316 | BSG005010R6              | RBCD1 cDNA RBCD05010 gene                                                                                                          |
| 1733460  | 1.47  | 0.0318 | Tmem8                    | transmembrane protein 8 (five membrane-spanning domains)                                                                           |
| 1748226  | -1.36 | 0.0318 | Lap1                     | lysophosphatidase 1                                                                                                                |
| 1744178  | -1.37 | 0.0319 | P272                     | purinergic receptor P2X, ligand-gated ion channel, 7                                                                               |
| 1722719  | -1.68 | 0.0319 | Calga2                   | collagen, type V, alpha 2                                                                                                          |
| 1733245  | -2.14 | 0.0319 | AP2                      | AP-2/EBP2 family, member 2                                                                                                         |
| 1746279  | -1.58 | 0.032  | Tlr2                     | toll-like receptor 2                                                                                                               |
| 1743124  | -1.58 | 0.032  | Ctnt                     | connector enhancer of kinase suppressor of Ras 1                                                                                   |
| 1755238  | -2.05 | 0.0321 | Igk-V1: IgV1-110; Igk-V5 | immunoglobulin kappa chain variable 1 (V1), immunoglobulin kappa variable 1-110, immunoglobulin kappa chain variable 5 (V5 family) |
| 1747468  | 2.15  | 0.0321 | Ltr4b                    | leucine rich repeat containing 4B                                                                                                  |
| 1736375  | -1.43 | 0.0322 | Gm14412                  | predicted gene, 14412 [Source: MGI Symbol Acc: MGI:3632251]                                                                        |
| 1734958  | -2.19 | 0.0322 |                          |                                                                                                                                    |
| 1734960  | -2.19 | 0.0322 |                          |                                                                                                                                    |
| 1725898  | 1.53  | 0.0322 | Gm08888                  | predicted gene, 26888 [Source: MGI Symbol Acc: MGI:5477382]                                                                        |
| 1745839  | -1.42 | 0.0323 | Cpep1                    | cadherin-like and PC-esterase domain containing 1                                                                                  |
| 1725206  | 1.36  | 0.0323 | Rb3                      | reticuli-like 3                                                                                                                    |
| 1725277  | -1.4  | 0.0328 | Ccr4                     | CCR4-NOT transcription complex, subunit 6                                                                                          |
| 1749002  | -1.49 | 0.0328 | Gdm4                     | glial integral membrane protein 4                                                                                                  |
| 1737215  | -1.28 | 0.0328 | Igaw                     | ilegase alpha V                                                                                                                    |
| 1730685  | -1.42 | 0.0328 | Ddb1                     | DDH1 domain containing 1                                                                                                           |
| 1725296  | -1.32 | 0.033  | Gm1768                   | predicted gene, 1768 [Source: MGI Symbol Acc: MGI:364258]                                                                          |
| 1722825  | -1.78 | 0.0331 | Nab1                     | nucleic acid binding protein 1                                                                                                     |
| 1735781  | -1.52 | 0.0331 | Phn2                     | stomach homeobox 2 (Drosophila)                                                                                                    |
| 1725391  | 1.84  | 0.0331 | Gm214                    | predicted gene, 214 [Source: MGI Symbol Acc: MGI:3644422]                                                                          |
| 1749417  | 1.42  | 0.0332 | Plov1                    | prostate tumor over expressed gene 1                                                                                               |
| 1740133  | -1.47 | 0.0332 | Scp2b2                   | solute carrier family 26 (mitochondrial carrier, phosphate carrier), member 24                                                     |
| 1723360  | 1.39  | 0.0334 | Cma3                     | catenin (cadherin associated protein), alpha 3                                                                                     |
| 1713336  | -1.4  | 0.0335 | Bmp2                     | bone morphogenetic protein receptor, type II (seminolethal kinase)                                                                 |
| 1743255  | -2.08 | 0.0335 | Gnap                     | guanine nucleotide activating protein                                                                                              |
| 1744821  | -2.21 | 0.0337 | Cma2                     | catenin (cadherin associated protein), alpha 2                                                                                     |
| 1738334  | -1.4  | 0.0337 | Gm1480                   | predicted gene, 1480 [Source: MGI Symbol Acc: MGI:5454861]                                                                         |
| 1734126  | 1.38  | 0.0337 | Fat13                    | fibroblast growth factor 13                                                                                                        |
| 1717106  | 1.76  | 0.0337 |                          | edonucleotide pyrophosphatase/phosphodiesterase 2                                                                                  |
| 1744892  | -1.31 | 0.0337 | LOC102436903; Gm14081    | nucleophosmin-like, predicted gene, 14081 [Source: MGI Symbol Acc: MGI:3705734]                                                    |
| 1716222  | -1.37 | 0.0337 | Elp2                     | UDP-GlcNAc 6-epimerase 2                                                                                                           |
| 1736186  | -1.44 | 0.0337 | Tmem81a                  | transmembrane protein 81A                                                                                                          |
| 1740421  | -1.87 | 0.0339 | Kctd12b                  | potassium channel tetramerisation domain containing 12b                                                                            |
| 1747115  | 1.38  | 0.034  | Kma1                     | potassium voltage-gated channel, shaker-related subfamily, member 1                                                                |
| 1754707  | 1.38  | 0.034  | Gm3698; Gm3692           | predicted gene, 3698; predicted gene, 3692                                                                                         |
| 1745195  | 1.5   | 0.034  | Cyba2                    | crystallin, beta A2                                                                                                                |
| 1751664  | -1.33 | 0.0342 | Fab                      | polydiphenyl isomerase B                                                                                                           |
| 1737455  | -1.56 | 0.0343 | Spred1                   | sprouty protein with EVH-1 domain 1, related sequence                                                                              |
| 1734927  | -1.32 | 0.0344 | Rm3                      | RNA binding motif protein 3                                                                                                        |
| 1737798  | 1.28  | 0.0344 | Rz                       | RNA endonuclease protein                                                                                                           |
| 1731670  | -1.78 | 0.0348 | Gm3303                   | predicted gene, 3303 [Source: MGI Symbol Acc: MGI:5452810]                                                                         |
| 1743441  | -1.36 | 0.0348 | Bmp2k                    | bone morphogenetic protein receptor, type II kinase                                                                                |
| 1740342  | -1.51 | 0.0349 | Rpf2                     | ribosome production factor 2 homolog (S. cerevisiae)                                                                               |
| 1744787  | -1.59 | 0.0349 |                          |                                                                                                                                    |
| 1744699  | -1.34 | 0.0349 | Dnaq2                    | DnaH (Hsp40) homolog, subfamily C, member 2                                                                                        |
| 1723177  | -1.57 | 0.0349 | Fuc2                     | fucosidase, alpha-L-2, plasma                                                                                                      |
| 1727070  | -1.52 | 0.0349 | Cabp61                   | calyculin-binding protein 61                                                                                                       |
| 1748184  | -1.47 | 0.0349 | Akap1                    | A kinase (PRKA) interacting protein 1                                                                                              |
| 1725143  | 1.36  | 0.0349 | Nab3b                    | Nalpl3/acidyltransferase 3b, NaH, acyltransferase                                                                                  |
| 1751140  | 1.58  | 0.0349 | Phag1                    | phosphatase kinase domain                                                                                                          |
| 1733532  | 1.32  | 0.035  | Swi3                     | synaptobrevin-like 3                                                                                                               |
| 1725926  | 1.3   | 0.035  | Tach3                    | tachykinin 3                                                                                                                       |
| 1728655  | -1.44 | 0.035  | Smn1b                    | small integral membrane protein 1b                                                                                                 |
| 1747187  | -1.59 | 0.035  |                          | glutathione transferase, cytosolic                                                                                                 |
| 1727936  | -1.59 | 0.035  | Ime1                     | transmembrane 1 superfamily, member 1                                                                                              |
| 1729457  | 1.41  | 0.0352 | Rv2                      | ryanodine receptor 2, cardiac                                                                                                      |
| 1740789  | -1.57 | 0.0352 | Deaf1b                   | deafness, non-syndromic, type 1B                                                                                                   |
| 17278410 | -1.46 | 0.0353 | Gsk3                     | GSK3 interacting protein                                                                                                           |
| 1725363  | -2.12 | 0.0353 | Ucpb                     | ubiquitin-cytochrome c nucleic acid binding protein                                                                                |
| 1746511  | 1.35  | 0.0353 |                          | cytochrome c                                                                                                                       |
| 1728695  | 1.5   | 0.0353 | Mir82; Rbp37a            | microRNA 82; ribosomal protein L37a                                                                                                |
| 1750177  | 1.69  | 0.0354 |                          | ribonuclease P RNA-like 3                                                                                                          |
| 1726921  | 1.49  | 0.0354 | Pol22                    | polymerase (DNA directed), delta 2, regulatory subunit                                                                             |
| 1744694  | -1.79 | 0.0354 | Gfllx                    | glucosyl-phosphatidylcholine transferase X-linked                                                                                  |
| 1726025  | -1.59 | 0.0354 | Fcrl1                    | Fc receptor, IgG, high affinity 1                                                                                                  |
| 1730265  | -1.61 | 0.0356 | Gedf                     | glycyl dipeptidase 6                                                                                                               |
| 1744953  | -1.47 | 0.0356 | Fk3                      | glutathione S-transferase 3                                                                                                        |
| 1723849  | 1.33  | 0.0356 | Ankrd52                  | ankyrin repeat domain 52                                                                                                           |
| 1724361  | 1.5   | 0.0356 |                          | ankyrin repeat domain 52                                                                                                           |
| 1735704  | -1.34 | 0.0357 | Afb                      | actin-binding protein 1                                                                                                            |
| 1731415  | -1.35 | 0.0359 | Sh3                      | src homology 3 domain                                                                                                              |
| 1726005  | 1.65  | 0.0359 | Hspu1                    | homocysteine-inducible, endoplasmic reticulum stress-inducible, ubiquitin-like domain member 1                                     |
| 1732151  | 1.29  | 0.0359 | Prkag1                   | protein kinase, AMP-activated, gamma 1 non-catalytic subunit                                                                       |
| 1725106  | 1.6   | 0.0359 | Act11b                   | actin, beta 11                                                                                                                     |
| 17351001 | 1.58  | 0.0361 | Gm24                     | predicted gene, 24 [Source: MGI Symbol Acc: MGI:3644422]                                                                           |
| 1735034  | 1.38  | 0.0361 | Aclm1                    | acyl-CoA oxidase 1, medium chain                                                                                                   |
| 1741972  | 1.4   | 0.0361 | Prk2                     | protein kinase, cAMP-dependent, type II, alpha                                                                                     |
| 1729877  | -1.39 | 0.0361 | Enb2p                    | aromatic L-tryptophan methyltransferase                                                                                            |
| 1731189  | -1.57 | 0.0362 | Onm                      | onion-like protein                                                                                                                 |
| 1736123  | 1.51  | 0.0362 | Adh1k                    | OTU domain with weak kinase specificity                                                                                            |
| 1743196  | -1.56 | 0.0362 | Pdk3                     | serine/threonine kinase, isoform 3                                                                                                 |
| 1743914  | -1.42 | 0.0362 | T1; Sep                  | serpin 11                                                                                                                          |
| 1745414  | 1.46  | 0.0363 | Aap1b                    | pyruvate dehydrogenase kinase, isoform 1b                                                                                          |
| 1750692  | -1.58 | 0.0363 | 84503010R6               | ANKK1 cDNA ANKKT0010 gene                                                                                                          |
| 1735848  | 3.09  | 0.0363 | Km2                      | ankyrin repeat and SOCS box-containing 15                                                                                          |
| 1748205  | -1.97 | 0.0363 | Nuc2b                    | nucleosome 2                                                                                                                       |
| 1726132  | -1.47 | 0.0363 | Anc2                     | ANKK1 cDNA ANKKT0010 gene                                                                                                          |
| 1723168  | 1.32  | 0.0363 | Agp5d                    | potassium channel, subfamily V, member 2                                                                                           |
| 1737708  | -1.46 | 0.0363 | Cm1                      | cardiac myosin C                                                                                                                   |
| 1729104  | -1.35 | 0.0365 | Ser1                     | serine/threonine kinase, isoform 1                                                                                                 |
| 1722390  | -1.41 | 0.0365 | Or2                      | odorant receptor 2, alpha                                                                                                          |
| 1747461  | 1.47  | 0.0367 | Cm2                      | cardiac myosin C                                                                                                                   |
| 1744958  | -1.75 | 0.0367 | Me703                    | microRNA 703                                                                                                                       |
| 1730595  | 1.48  | 0.0367 | 17050010R6               | RBCA1 cDNA RBCA0010 gene                                                                                                           |
| 1749595  | -1.51 | 0.0367 | Itih3p                   | interleukin 18 binding protein                                                                                                     |
| 1743226  | -1.45 | 0.0367 | Marcks                   | myristoylated alanine-rich protein kinase C substrate                                                                              |
| 1718070  | -1.41 | 0.0368 | Ubr4                     | UBX domain protein 4                                                                                                               |
| 1735976  | 1.27  | 0.0368 | Erf1a2                   | eukaryotic translation elongation factor 1 alpha 2                                                                                 |
| 1738678  | -1.31 | 0.0368 | Dmf                      | deafness, non-syndromic, type 1B                                                                                                   |
| 1732610  | -1.37 | 0.0368 | Prn1                     | protein S (alpha)                                                                                                                  |
| 1733364  | -1.42 | 0.0368 | Men                      | menin                                                                                                                              |
| 1745130  | -1.53 | 0.0368 | Cm11                     | cardiac myosin C                                                                                                                   |
| 1728010  | -1.43 | 0.0368 | h2                       | histone H2                                                                                                                         |
| 1725997  | 1.48  | 0.0368 | Cm12                     | cardiac myosin C                                                                                                                   |
| 1728007  | -1.31 | 0.0368 | Ac1b1                    | actin-binding protein 1                                                                                                            |
| 1733762  | -1.68 | 0.037  | Spn2                     | spontaneous protein 2                                                                                                              |
| 1714601  | 1.42  | 0.037  | Prk22                    | protein kinase, cAMP-dependent, type II, alpha                                                                                     |
| 1734673  | -1.52 | 0.037  | Fndc1                    | fibronectin type III domain containing 1                                                                                           |
| 1715413  | 1.38  | 0.037  | Prk2                     | protein kinase, cAMP-dependent, type II, alpha                                                                                     |
| 1733297  | 1.57  | 0.037  | mt-1v                    | mitochondrially encoded (RNA) (Source: MGI Symbol Acc: MGI:102472)                                                                 |
| 1730446  | -1.36 | 0.037  | Apt1                     | adaptor protein, phosphotyrosine interaction, PH domain and leucine zipper containing 1                                            |
| 1724529  | 1.8   | 0.0371 | Scp2b1b                  | solute carrier family 26, member 1b                                                                                                |
| 1728671  | 1.91  | 0.0372 | Gp22                     | G protein-coupled receptor 22                                                                                                      |
| 1713414  | -1.65 | 0.0372 | Kc2                      | keratin 2C                                                                                                                         |
| 1735004  | 1.73  | 0.0372 | Cyc2c39                  | cytochrome P450, family 2, subfamily c, polypeptide 39                                                                             |
| 1739702  | 1.38  | 0.0372 | Denn4d3                  | DENND4D domain containing 4B                                                                                                       |
| 1740604  | 1.35  | 0.0373 | Fam180a                  | papillary renal cell carcinoma (translocation-associated)                                                                          |
| 1748243  | -1.95 | 0.0373 | Fam180a                  | protein phosphatase 1K (PP2K) domain containing                                                                                    |
| 1754158  | -1.55 | 0.0373 | Igf1                     | immunoglobulin superfamily, member 1                                                                                               |
| 1742423  | 1.72  | 0.0373 | A644131                  | expressed sequence A644131                                                                                                         |
| 1736675  | -1.91 | 0.0373 | Fln1                     | fibrinogen-like protein 1                                                                                                          |
| 1736003  | -1.42 | 0.0373 | Nap                      | nucleic acid binding protein 1                                                                                                     |
| 1725767  | 1.39  | 0.0373 | Km2p                     | potassium inwardly-rectifying channel, subfamily 1, member 2                                                                       |
| 1721191  | 1.29  | 0.0373 | Smn2p1                   | small nuclear ribonucleoprotein C, beta 1                                                                                          |
| 1754567  | 1.59  | 0.0373 | Gm1196a                  | predicted gene, 1196a [Source: MGI Symbol Acc: MGI:3652241]                                                                        |
| 1748673  | -1.39 | 0.0373 | Un1                      | uniqueness 1                                                                                                                       |
| 1745323  | -1.75 | 0.0373 | n-Rcd3                   | nuclear encoded RNA 3 [Source: MGI Symbol Acc: MGI:4421737]                                                                        |
| 1728688  | -1.48 | 0.0373 | Sp1c2                    | serine palmitoyltransferase, long chain base subunit 2                                                                             |
| 1732827  | 1.28  | 0.0373 | Unk2c                    | uniqueness 2                                                                                                                       |
| 17441404 | 1.74  | 0.0373 | Sox2c                    | sox2 homeobox 2                                                                                                                    |
| 1748148  | 1.36  | 0.0376 | Mk3                      | myristoylated alanine-rich protein kinase C substrate                                                                              |
| 1723978  | -1.52 | 0.0377 | Esp4                     | eyes absent 4 homolog (Drosophila)                                                                                                 |
| 1744814  | 1.43  | 0.0377 | Gom                      | gonadotropin-releasing hormone receptor 2                                                                                          |
| 1729181  | 1.62  | 0.0377 | Alp1a1                   | alkaline phosphatase 1, alpha 1                                                                                                    |
| 1730586  | 2.7   | 0.0377 | Rbp1                     | ribonuclease P RNA component H1                                                                                                    |
| 1730188  | 1.4   | 0.0377 | At2                      | ATP-binding cassette, subfamily A, member 2                                                                                        |
| 1750239  | 1.52  | 0.0378 | Rab-3a                   | RAB3A, member RAS oncogene family                                                                                                  |
| 1733603  | 1.51  | 0.0379 | Calb2                    | calbindin, type VI, alpha 6                                                                                                        |
| 1743088  | 1.97  | 0.0379 | Mk113                    | microRNA 113                                                                                                                       |
| 1734326  | 1.46  | 0.0379 | Pcl1                     | peptidyl (prolyl) isomerase (cyclophilin) like 1                                                                                   |
| 1729473  | 1.4   | 0.0379 |                          |                                                                                                                                    |
| 1737794  | -2.51 | 0.0379 | Gm20081                  | predicted gene, 20081 [Source: MGI Symbol Acc: MGI:5455858]                                                                        |
| 1723708  | 1.34  | 0.0379 | Lnc20                    | leucine rich repeat containing 20                                                                                                  |
| 1742613  | -1.29 | 0.0379 | Cm1                      | cardiac myosin C                                                                                                                   |
| 1728439  | -1.8  | 0.038  | Igh2                     | immunoglobulin heavy chain 2 [Source: MGI Symbol Acc: MGI:4439800]                                                                 |
| 1734493  | -1.55 | 0.0381 | Gm13                     | guanine nucleotide binding protein-like 3 (nucleolar)                                                                              |
| 1744525  | -1.56 | 0.0381 | Hmnp1                    | heteronuclear nuclear ribonucleoprotein F                                                                                          |
| 1748714  | 1.51  | 0.0381 | Pm1k                     | protein phosphatase 1K (PP2K) domain containing                                                                                    |
| 1735274  | -1.52 | 0.0381 | Pp2r1                    | poly (ADP-ribose) polymerase family, member 8                                                                                      |
| 1736452  | 1.32  | 0.0381 | Rvaseh2p                 | ribonuclease H2, subunit 2                                                                                                         |
| 1733610  | 1.91  | 0.0382 | Ndu1a7                   | NADH dehydrogenase (ubiquinone) 1, alpha subcomplex, 7 (B14.5a)                                                                    |
| 1752701  | -1.53 | 0.0384 | Dync1l3                  | dynein cytoplasmic 1, light intermediate chain 1                                                                                   |
| 1723142  | -1.55 | 0.0384 | Samd5                    | sterile alpha motif domain containing 5                                                                                            |
| 1724269  | -2.03 | 0.0385 | Nap2                     | nucleic acid binding protein 2                                                                                                     |
| 1724769  | 1.43  | 0.0385 | Gm22789                  | predicted gene, 22789 [Source: MGI Symbol Acc: MGI:5452506]                                                                        |
| 1732715  | 1.4   | 0.0385 | Cm1p                     | cardiac myosin C                                                                                                                   |
| 1736655  | 1.47  | 0.0385 | Gm12c                    | predicted gene, 12c [Source: MGI Symbol Acc: MGI:5452506]                                                                          |
| 1715932  | 1.44  | 0.0385 | Sme1                     | cell death inducing 1 (p53) target 1                                                                                               |
| 1715044  | 1.36  | 0.0385 | Rab2c                    | ribosomal protein L30a pseudogene                                                                                                  |
| 1736574  | 1.59  | 0.0385 |                          | nucleosome 2                                                                                                                       |
| 1736574  | 1.59  | 0.0385 |                          | nucleosome 2                                                                                                                       |
| 1740973  | -1.4  | 0.0385 | Lm                       | leucine                                                                                                                            |
| 1715341  | -1.72 | 0.0385 | Scp2ab                   | solute carrier family 7 (cationic amino acid transporter, y+ system), member 5                                                     |
| 1750625  | -1.54 | 0.0386 | Ckap2                    | cytoskeleton associated protein 2                                                                                                  |
| 1726291  | -1.53 | 0.0386 | Gm4                      | glutathione peroxidase 8 (putative)                                                                                                |
| 1730641  | -1.45 | 0.0386 | Val3                     | vesiculoglycin 3 (Drosophila)                                                                                                      |
| 1740496  | -1.78 | 0.0386 | Anab                     | anion-binding protein 1                                                                                                            |
| 1735453  | -1.31 | 0.0386 | Cm2d3                    | cardiac myosin C                                                                                                                   |
| 1748961  | 1.6   | 0.0386 | Nuc210                   | nucleosome 210                                                                                                                     |
| 1723796  | 1.31  | 0.0386 | Cm2p                     | cardiac myosin C                                                                                                                   |
| 1735207  | 1.35  | 0.0387 | Tmem223; Nd1             | transmembrane protein 223; nuclear RNA export factor 1                                                                             |
| 1748994  | 1.33  | 0.0387 | Rpl1                     | ribosomal protein L1                                                                                                               |
| 1752925  | -1.59 | 0.0388 | Synrcp                   | synaptobrevin binding, cytosolic RNA interacting protein                                                                           |
| 1737541  | -1.52 | 0.039  | Prp3; Pm                 | proton pump, proton pump gene complex                                                                                              |
| 1745220  | -1.37 | 0.039  | Gm2                      | glutathione peroxidase 2                                                                                                           |
| 1735369  | -1.85 | 0.039  | Hbaf1                    | heparin-binding EGF-like growth factor                                                                                             |
| 1748995  | -1.38 | 0.039  | Igf2                     | insulin-like growth factor 2                                                                                                       |
| 1728185  | -1.38 | 0.039  | Nab3                     | nucleosome 3                                                                                                                       |
| 1714622  | 1.48  | 0.039  | Nab3                     | nucleosome 3                                                                                                                       |
| 1750260  | 2.12  | 0.039  |                          | solute carrier family 4 (anion exchanger), member 3                                                                                |
| 1736444  | -1.36 | 0.0391 | Pp2r1                    | polycomb group ring finger 1                                                                                                       |
| 1744608  | -1.51 | 0.0391 | Cd12                     | CD12 antigen                                                                                                                       |
| 1724146  | -1.37 | 0.0391 | Zn2                      | zinc finger protein 365                                                                                                            |
| 1736990  | -1.48 | 0.0391 | Gm5                      | G protein-coupled receptor kinase 5                                                                                                |
| 1730797  | 1.34  | 0.0391 | Nap2p                    | nucleic acid binding protein 2                                                                                                     |
| 1735940  | -1.84 | 0.0391 | Gm27042                  | predicted gene, 27042                                                                                                              |
| 1726621  | -1.35 | 0.0391 |                          | MDK kinase 1 (yeast)                                                                                                               |
| 1745018  | -1.46 | 0.0391 | Igf1r3                   | insulin-like growth factor, beta receptor III                                                                                      |
| 1734274  | -1.42 | 0.0391 | Sme2                     | SLMO2/serpin specific protease 2                                                                                                   |

|          |       |        |                     |                                                                                            |
|----------|-------|--------|---------------------|--------------------------------------------------------------------------------------------|
| 1750450  | -1.35 | 0.0391 | Pma                 | prolymmon alpha                                                                            |
| 1751115  | -1.33 | 0.0391 | Ptp3c, Gm38518      | polyprimidine tract binding protein 3; predicted gene, 38518                               |
| 1742536  | -1.26 | 0.0391 | Ubr2t               | ubiquitin-conjugating enzyme E2J 1                                                         |
| 1741252  | -1.33 | 0.0391 | Mus1                | microchondr tumor suppressor 1                                                             |
| 1750907  | -1.27 | 0.0396 | Trab2b              | Trab domain containing 2b                                                                  |
| 1741700  | -1.82 | 0.0396 | Gm1795              | predicted gene 17195                                                                       |
| 1727201  | -1.48 | 0.0396 | Trab3               | trapatite motif-containing 63                                                              |
| 17419731 | 1.43  | 0.0396 | Trab3               | MA22 endotoxin arrest deficient-like 1                                                     |
| 1740236  | -1.41 | 0.0398 | Mus21               | muslin microtubule interactor 2                                                            |
| 1743075  | 1.12  | 0.0398 | Emn2                | estradiol, calmodulin binding protein                                                      |
| 1743281  | -1.27 | 0.0398 | Slim                | neural cholesterol ester hydrolase 1; predicted gene, 42162                                |
| 1750399  | 1.26  | 0.0398 | Ncap1, Gm4162       | pentacyclopent repeat domain 3                                                             |
| 1746790  | 1.72  | 0.0398 | Phd3                | receptor transporter protein 4                                                             |
| 1732446  | -1.38 | 0.0398 | Rim4                | regulating synaptic membrane exocytosis 2                                                  |
| 1731213  | -1.18 | 0.0398 | Rim2                | fast storage-induced transmembrane protein 1                                               |
| 1730544  | 1.44  | 0.0398 | Fim1                | Chp3300-interacting transmembrane with Glu349-rich cytoplasmic domain 2                    |
| 1731784  | 1.27  | 0.0398 | Cas2p               | phosphoprotein enriched in astrocytes 15A                                                  |
| 1722842  | -1.35 | 0.0399 | Pea15a              | natriuretic peptide receptor 3                                                             |
| 1731043  | -1.56 | 0.04   | Nrc3                | zinc finger protein 330 pseudogene, predicted gene 7753 [Source MGI Symbol Acc:MG1:364546] |
| 1754928  | -1.27 | 0.04   | LOC10059127, Gm7785 | transmembrane protein 246                                                                  |
| 1742548  | 1.26  | 0.04   | Tmem246             | kidney                                                                                     |
| 1730540  | 1.53  | 0.04   | Pgn                 | mitochondrial ribosomal protein L10                                                        |
| 17258719 | 1.23  | 0.04   | Mpi10               | bronectin 1                                                                                |
| 1722471  | -1.36 | 0.0401 | Fat1                | emrionectin 5                                                                              |
| 17397120 | 1.39  | 0.0401 | Emn2p               | acylcholinesterase                                                                         |
| 1738586  | -1.73 | 0.0401 | Aach                | single-pass membrane protein with coiled-coil domains 1                                    |
| 1733476  | 1.43  | 0.0403 | Smcct1              | stem-cap                                                                                   |
| 1725887  | 2.2   | 0.0403 | Tcap                | deglucosyl of cyclotriene 7                                                                |
| 17427494 | -1.34 | 0.0403 | Dock7               | acyl-CoA thioesterase 2                                                                    |
| 17271734 | 1.63  | 0.0403 | Acod2               | predicted gene 16116                                                                       |
| 1751575  | 1.25  | 0.0403 | Gm16116             | acyl-CoA thioesterase 4                                                                    |
| 1744326  | 1.6   | 0.0403 | Acod3               | BCL2adenovirus E1B interacting protein 1                                                   |
| 1734970  | 1.26  | 0.0403 | Bmp1                | protein kinase inhibitor, gamma                                                            |
| 1737504  | 1.28  | 0.0403 | Phk3                | mitochondrial ribosomal protein S33                                                        |
| 17466195 | 1.33  | 0.0404 | Mps33               | TCDD-inducible poly(ADP-ribose) polymerase                                                 |
| 1739683  | -1.29 | 0.0404 | Tlpsn               | collagen type 1 alpha 2                                                                    |
| 1743001  | -1.36 | 0.0404 | Col1a2              | endothelial PAS domain protein 1                                                           |
| 17340197 | 1.42  | 0.0405 | Ena1                | nail related transcription factor 1                                                        |
| 1733226  | -1.66 | 0.0405 | Rum1                | size scale-related homeobox 5                                                              |
| 1747440  | 1.44  | 0.0405 | Srsf                | small nuclear RNA, cytoplasmic 3                                                           |
| 1735011  | -1.36 | 0.0407 | Naf1p               | PCD family interacting protein 1                                                           |
| 1743178  | 1.31  | 0.0407 | Cypl3d4             | cytochrome P450, family 3, subfamily A, polypeptide 44                                     |
| 17427961 | 1.39  | 0.0407 | Gal2                | carbamate palmitoyltransferase 2                                                           |
| 1731993  | -1.47 | 0.0408 | Rat14               | telomeric acid inducible 14                                                                |
| 1736977  | 1.46  | 0.0409 | 17002040706         | BRCA1 cDNA 17002040706                                                                     |
| 1736474  | -1.55 | 0.0409 | Palm1               | PDZ and LIM domain 1 (elfin)                                                               |
| 1722544  | -1.68 | 0.0409 | Scat                | steroid 14-oxyltransferase 1                                                               |
| 17450741 | 1.48  | 0.0409 | Alpk5               | ATP synthase, H <sup>+</sup> transporting, mitochondrial F1F0 complex, subunit E           |
| 1738429  | 1.31  | 0.0409 | Arbrn               | arbrin repeat domain 3                                                                     |
| 17381437 | 1.31  | 0.0409 | Edchc3              | enoyl-Coenzyme A hydratase domain containing 3                                             |
| 1735677  | -1.24 | 0.041  | Stampl1             | STAM binding protein like 1                                                                |
| 1742136  | 1.31  | 0.041  | Gm11818             | predicted gene 11818                                                                       |
| 1731491  | 1.68  | 0.041  | Gm8973              | predicted gene 8973 [Source MGI Symbol Acc:MG1:364834]                                     |
| 1748686  | 1.69  | 0.041  | Gm343               | glycogen synthase kinase 3 alpha                                                           |
| 1745075  | -1.3  | 0.0412 | Poa18               | prothalamine 18                                                                            |
| 1741616  | -1.51 | 0.0413 | Clat                | complement component 3a receptor 1                                                         |
| 1737622  | -1.75 | 0.0415 | Gm13459             | predicted gene 13459 [Source MGI Symbol Acc:MG1:3651389]                                   |
| 1742069  | 1.33  | 0.0415 | Pea19               | peroxisomal lipoprotein factor 19                                                          |
| 1739192  | 1.36  | 0.0415 | Pea19               | phospho beta 1 binding protein 2                                                           |
| 1740668  | -1.33 | 0.0415 | Ccd14a              | CCD14 cell division cycle 14A                                                              |
| 1735496  | 1.22  | 0.0415 | Tafaa               | TAF4A RNA polymerase 1, TAF4A box binding protein (TBP)-associated factor                  |
| 1726486  | -1.49 | 0.0415 | Chn1b               | cholinergic receptor, nicotinic, beta polypeptide 1 (muscle)                               |
| 1738791  | -1.4  | 0.0415 | Chn1p               | heterotrimeric nuclear ribonucleoprotein F                                                 |
| 1738148  | 1.53  | 0.0415 | Chn1p               | one small ribosome subunit 1                                                               |
| 1728702  | -1.79 | 0.0415 | Raf49               | RAF49 homolog (S. cerevisiae)                                                              |
| 17427383 | 1.59  | 0.0415 | Gm117248            | predicted gene 117248 [Source MGI Symbol Acc:MG1:3652135]                                  |
| 1751216  | 1.46  | 0.0416 | Dhnd                | glyoxylate dehydrogenase                                                                   |
| 1731362  | -1.4  | 0.0417 | Mbp                 | Mdm2, transcribed 373 not modifiable 33 binding protein                                    |
| 1746917  | -1.54 | 0.0417 | Chn1p               | BS1 ribosome factor homolog (S. cerevisiae)                                                |
| 1749622  | 1.48  | 0.0418 | Sncd35a             | small nuclear RNA, GCD box 35A                                                             |
| 1726264  | 1.36  | 0.0418 | Chn1p               | solute carrier family 2 (facilitated glucose transporter), member 4                        |
| 1726003  | -2.1  | 0.0419 | Hcn1                | hyperpolarization-activated, cyclic nucleotide-gated K <sup>+</sup> 1                      |
| 1736209  | -1.38 | 0.0419 | Esf1                | ESF 1, nuclear pre-rRNA processing protein, homolog (S. cerevisiae)                        |
| 1736209  | -1.43 | 0.0419 | Nms                 | neurospiral RNA synthetase                                                                 |
| 17231040 | 1.32  | 0.042  | Nemf                | neuron derived neurotrophic factor                                                         |
| 1745174  | -1.33 | 0.042  | Car1                | carbamoylase domain containing 176                                                         |
| 1738132  | -1.22 | 0.042  | Ahd17b              | aldolase domain containing 176                                                             |
| 1745494  | 1.3   | 0.042  | Gm4108              | predicted gene 4108                                                                        |
| 1747527  | 1.36  | 0.042  | 2310016011Rk        | RIKEN cDNA 2310016011 gene                                                                 |
| 1742571  | -1.55 | 0.042  | Tu17                | tubulin tyrosine ligase-like family, member 7                                              |
| 1746078  | -1.59 | 0.0421 | Procin              | phosphatidylcholine binding chaperon assembly protein                                      |
| 1742533  | 1.67  | 0.0421 | Lgpl14b             | erythrocyte membrane protein band 4.1 like 4b                                              |
| 1743162  | 1.34  | 0.0421 | Rpl16b              | ribosomal protein L16b                                                                     |
| 1726816  | 1.74  | 0.0421 | Tpp1                | tubulin polymerization promoting protein                                                   |
| 1739558  | 1.6   | 0.0423 | Pip21b              | protein phosphatase 1, regulatory subunit 26                                               |
| 17443631 | 1.25  | 0.0424 | Gm4244              | TC24 domain family, member 4                                                               |
| 1726078  | 1.91  | 0.0424 | Gm416               | predicted gene 4416                                                                        |
| 1727814  | 1.71  | 0.0424 | Snd4                | sodium channel, voltage-gated, type IV, alpha                                              |
| 1745475  | 1.34  | 0.0424 | Snd4                | sodium channel, voltage-gated, type IV, alpha                                              |
| 1746012  | 1.29  | 0.0424 | Nr12                | nuclear receptor subfamily 1, group 11, member 2                                           |
| 1746078  | -1.59 | 0.0424 | Nr12                | active BCL2-related gene 1                                                                 |
| 17451816 | -1.4  | 0.0427 | Hsp8b               | heat shock protein 8                                                                       |
| 1739544  | 1.28  | 0.0427 | Prn1                | frequently mutated in activated T cell lymphomas                                           |
| 17475026 | 1.41  | 0.0429 | Ebn1                | erythrocyte membrane protein band 4.1 like 4b                                              |
| 1737389  | -1.31 | 0.0429 | Maep1               | myeloid associated protein, RPL18 family, member 1                                         |
| 1726066  | -1.29 | 0.0429 | Cenp1a3             | casein kinase 1, gamma 3                                                                   |
| 1746833  | 1.51  | 0.0429 | Ipscl1              | K2 motif and Sec1 domain 1                                                                 |
| 1746815  | 1.36  | 0.043  | Prn3                | proline rich 3                                                                             |
| 1735875  | -1.31 | 0.043  | Pip2                | phosphatidylcholine 2                                                                      |
| 1746844  | -1.57 | 0.0431 | Son1b               | sodium channel, voltage-gated, type 1, beta                                                |
| 1726786  | 1.53  | 0.0431 | 170006040Rk         | RIKEN cDNA 170006040 gene                                                                  |
| 17280297 | 1.4   | 0.0431 | Dic2c               | DIP2 disco-interacting protein 2 homolog C (Drosophila)                                    |
| 1735877  | -1.4  | 0.0431 | Nr10                | nuclear receptor-like 10                                                                   |
| 1735191  | 1.53  | 0.0431 | Nr10                | neuroblastin-like 2                                                                        |
| 1721767  | -1.26 | 0.0431 | Gm3048              | predicted gene 3048 [Source MGI Symbol Acc:MG1:3645825]                                    |
| 1723152  | -1.97 | 0.0431 | Lig2                | lethal giant larvae homolog 2 (Drosophila)                                                 |
| 1725841  | 1.33  | 0.0432 | Mbr1                | mesoderm inducer 1, regulator 1 homolog (Drosophila)                                       |
| 1741610  | -1.27 | 0.0432 | Hsp1                | heat shock 100kDa/110kDa protein                                                           |
| 1731008  | -1.58 | 0.0433 | Dap                 | death-associated protein                                                                   |
| 1751997  | -1.52 | 0.0433 | Tmem184c            | transmembrane protein 184C                                                                 |
| 17268185 | -1.33 | 0.0433 | Nap1                | nuclear speckle regulatory protein 1                                                       |
| 1743311  | 1.3   | 0.0433 | Ankrd               | ANKRD-like                                                                                 |
| 1743729  | -1.36 | 0.0433 | Slm2                | stromal interaction molecule 2                                                             |
| 1733100  | 1.34  | 0.0435 | Rpl123              | ribosomal protein L23                                                                      |
| 1722958  | -1.54 | 0.0437 | Fat1b               | Fs receptor, iso, type II, alpha 1, gamma polypeptide                                      |
| 1744000  | -1.75 | 0.0437 | Gm26876             | expressed sequence A206876                                                                 |
| 1737841  | -1.29 | 0.0437 | Rim2                | enhancer of autophagy homolog 2 (Drosophila)                                               |
| 1739538  | 1.44  | 0.0437 | 4921511C10Rk        | RIKEN cDNA 4921511C10 gene                                                                 |
| 1726701  | -1.31 | 0.0439 | Scp1p               | serine carboxypeptidase 1                                                                  |
| 1736144  | -1.63 | 0.044  | Dn3                 | disphosphatidylase 3                                                                       |
| 1724322  | 1.32  | 0.0441 | Tmm13               | translocase of inner mitochondrial membrane 13                                             |
| 17468791 | 1.34  | 0.0441 | Mps2v               | mitogen-activated protein kinase kinase 7                                                  |
| 1726361  | 1.41  | 0.0442 | Prox2               | protoporphyrinogen oxidase 2                                                               |
| 1733014  | 1.6   | 0.0443 | Ndu6a               | NADH dehydrogenase (ubiquinone) beta subcomplex 4                                          |
| 1740528  | -1.31 | 0.0444 | Nes                 | neurosecretory RNA synthetase                                                              |
| 1744899  | -2.15 | 0.0444 | Enr2                | neurosecretory RNA synthetase                                                              |
| 1746877  | -1.33 | 0.0445 | Enr2                | neurosecretory RNA synthetase                                                              |
| 17517404 | -1.4  | 0.0446 | Dnaad               | DNAJ (Hsp40) homolog, subfamily A, member 4                                                |
| 1729713  | -1.31 | 0.0446 | Atf4                | ATF4-like transcription factor 4                                                           |
| 1746003  | 1.36  | 0.045  | Gm31                | general transcription factor III C 1                                                       |
| 1748534  | 1.35  | 0.045  | Gd4p5               | glycerophospholipid phosphatidyltransferase domain containing 5                            |
| 1721788  | -1.37 | 0.045  | Smc1p               | small Cdc20P                                                                               |
| 1747711  | -1.36 | 0.045  | Gm21319             | predicted gene 21319                                                                       |
| 1736563  | -1.65 | 0.0452 | Wsb1                | WU repeat and SDC3 box-containing 1                                                        |
| 1725840  | -1.56 | 0.0452 | App1a3              | APPase type 1A3                                                                            |
| 1739812  | -1.55 | 0.0453 | St10ab              | ST10 calcium binding protein A6 (calycin)                                                  |
| 1741342  | 1.47  | 0.0453 | Fkbp2               | FKBP2 binding protein 4                                                                    |
| 1750848  | 1.42  | 0.0453 | Cac37               | cell division cycle 37                                                                     |
| 1727174  | -1.38 | 0.0453 | Mps3                | membrane protein, palmitoylated 3 (MAP3L p55 subfamily member 5)                           |
| 1747127  | -1.57 | 0.0453 | Csp                 | CSP action                                                                                 |
| 1734424  | 1.48  | 0.0453 | 1110038B12Rk        | RIKEN cDNA 1110038B12 gene [Source MGI Symbol Acc:MG1:1916013]                             |
| 1748727  | 1.35  | 0.0453 | Spic                | spic-like kinase 2                                                                         |
| 1728974  | -1.59 | 0.0453 | Pk2                 | proline kinase 2                                                                           |
| 1728291  | 1.41  | 0.0453 | Gm2614              | predicted gene 2614                                                                        |
| 1740150  | -1.28 | 0.0456 | Tpm3                | titin protein, alpha 3                                                                     |
| 1740574  | 1.34  | 0.0456 | Gm2341              | eotopic viral integration site 5; predicted gene, 42149                                    |
| 1737136  | -2.25 | 0.0457 | Acad                | acyl-CoA synthetase short-chain family member 1                                            |
| 1733262  | 1.39  | 0.0457 | Zfp523              | zinc finger protein 523                                                                    |
| 1721284  | -1.58 | 0.0458 | 1900017C10Rk        | RIKEN cDNA 1900017C10 gene                                                                 |
| 1720113  | 1.4   | 0.0458 | Gia3                | GTP binding protein, alpha 3                                                               |
| 1745990  | -1.41 | 0.0458 | Euk1, Gm42148       | eotopic viral integration site 5; predicted gene, 42149                                    |
| 1736290  | 1.33  | 0.0459 | Acad1               | acyl-CoA synthetase short-chain family member 1                                            |
| 1736363  | -1.34 | 0.0459 | Pum3                | pumilio RNA-binding family member 3                                                        |
| 1740585  | -1.64 | 0.046  | Rpl13-84            | ribosomal protein L13-84                                                                   |
| 1723304  | -1.4  | 0.046  | Nu1                 | nuclear undecylenyl pyrophosphate synthase 1 homolog (S. cerevisiae)                       |
| 1739588  | 1.27  | 0.0461 | Rim2d               | RNA binding motif protein 2d                                                               |
| 1741717  | 1.45  | 0.0461 | Nu1a3               | NADH dehydrogenase (ubiquinone) 1, alpha subcomplex, 3                                     |
| 1744604  | -1.4  | 0.0463 | Imadp               | impact, DWD domain protein                                                                 |
| 1747631  | 1.76  | 0.0463 | Nip1p               | NLR family, pyrin domain containing 1A                                                     |
| 1746003  | 1.62  | 0.0465 | Srsf17              | solute carrier family 8 (inositol-transectin transporter), member 17                       |
| 17475295 | 1.47  | 0.0465 | 4732471J01Rk        | RIKEN cDNA 4732471J01 gene                                                                 |
| 1746204  | -1.42 | 0.0465 | Cnfr                | calpain                                                                                    |
| 17310673 | 1.3   | 0.0467 | Ank                 | progressive ankylosis                                                                      |
| 1737608  | 1.69  | 0.0468 | 1110042C24Rk        | RIKEN cDNA 1110042C24 gene                                                                 |
| 1725166  | -1.29 | 0.0468 | Gm1                 | CD47 antigen (Rb-related antigen, integrin-associated signal transducer)                   |
| 1750063  | -1.28 | 0.0468 | Fam148a             | family with sequence similarity 148, member A                                              |
| 1726039  | 1.47  | 0.0468 | Gat                 | GAT histone family, member V                                                               |
| 1741295  | -1.45 | 0.0468 | Bach2               | BTF1 and C/EBP homolog 2                                                                   |
| 1745498  | -1.36 | 0.0469 | Cox19               | cytochrome c oxidase assembly protein 19                                                   |
| 1744786  | -1.31 | 0.0469 | Nap14               | NAP14 nuclear protein                                                                      |
| 1721241  | -1.68 | 0.0469 | Col1a1              | collagen, type I, alpha 1                                                                  |
| 17331078 | -1.8  | 0.0471 | Imnmda              | transmembrane protein dda                                                                  |
| 1750330  | 1.39  | 0.0471 | Hoxk2               | homeo domain 2 (Drosophila)                                                                |
| 1731980  | -1.29 | 0.0471 | Bkx1                | BKX1, degenerate of RhoGuanin, homolog (S. cerevisiae)                                     |
| 1736483  | 1.4   | 0.0471 | Nr1                 | neurosecretory RNA synthetase 1 (S. cerevisiae)                                            |
| 1739563  | -1.33 | 0.0473 | Tnck                | TEC40 homolog (S. cerevisiae)                                                              |
| 1750247  | -1.4  | 0.0473 | Tnck                | threonine-related transmembrane protein 3                                                  |
| 1748501  | 1.39  | 0.0474 | 2310040C24Rk        | RIKEN cDNA 2310040C24 gene                                                                 |
| 1738174  | 1.28  | 0.0474 | Pae                 | peroxisomal biogenesis factor 6                                                            |
| 1750522  | 1.53  | 0.0474 | Erf1                | Erf1 C-terminal-like 1 (S. cerevisiae)                                                     |
| 1721348  | -1.67 | 0.0474 | Cy22a1              | cytochrome P450, family 20, subfamily A, polypeptide 1                                     |
| 1750526  | -1.27 | 0.0474 | Dna1c1c             | Dna1 (Hsp40) homolog, subfamily C, member 18                                               |
| 1740444  | -1.24 | 0.0475 | Cen13               | COLF-like MARVEL transmembrane domain containing 3                                         |
| 1749763  | 1.44  | 0.0475 | Cen13               | centrin 3                                                                                  |
| 1751746  | -1.44 | 0.0475 | Abp1                | ATP-binding cassette, sub-family E (CAATP), member 1                                       |
| 1740060  | 1.43  | 0.0475 | Dna1c1c             | Dna1 (Hsp40) homolog, subfamily C, member 18                                               |
| 1720175  | 1.39  | 0.0477 | Zfp340              | zinc finger protein 340                                                                    |
| 17391212 | -1.23 | 0.048  | Ncap1               | non-SMC condensin I complex, subunit H                                                     |
| 1744309  | 1.38  | 0.048  | Rp                  | ribosomal protein                                                                          |
| 1739539  | 1.35  | 0.0481 | Gm2773              | predicted gene 2773 [Source MGI Symbol Acc:MG1:3452550]                                    |
| 1730919  | 1.33  | 0.0481 | Dna1c1c             | DDB1 and CUL4 associated factor 11                                                         |
| 1751725  | 1.43  | 0.0481 | Nrc1                | neoglycan                                                                                  |
| 1754185  | -1.33 | 0.0482 | Mmap73              | MAP7 domain containing 3                                                                   |
| 1744595  | 1.47  | 0.0482 | Tn3a                | Tn3a                                                                                       |
| 1740528  | -1.36 | 0.0482 | Elova6              | ELOVL family member 6, elongation of long chain fatty acids (yeast)                        |
| 1750170  | 1.39  | 0.0482 | Abd5                | arabinosyl repeat and SDC3 box-containing 5                                                |
| 1720170  | -1.42 | 0.0482 | Ras                 | arabinosyl RNA synthetase                                                                  |
| 1744836  | 1.38  | 0.0482 | Mpv17               | Mpv17 mitochondrial inner membrane protein                                                 |
| 1740485  | -1.36 | 0.0482 | Hsp7a               | hepatoma protein, type 1, domain containing 7A                                             |
| 1728142  | -1.34 | 0.0482 | Cp2                 | cytochrome c oxidase                                                                       |
| 17361304 | 1.38  |        |                     |                                                                                            |

|          |       |        |                |                                                                                                                                       |
|----------|-------|--------|----------------|---------------------------------------------------------------------------------------------------------------------------------------|
| 17324332 | -1.54 | 0.0482 | Fetub          | fetub beta                                                                                                                            |
| 17355180 | -1.51 | 0.0483 | Msd1           | major facilitator superfamily domain containing 1                                                                                     |
| 17445860 | -1.72 | 0.0485 | Napend         | N-acyl phosphatidylethanolamine phospholipase D                                                                                       |
| 17465530 | 3.49  | 0.0485 | Rsv1           | RNA Y1 small cytoplasmic, Rv-associated                                                                                               |
| 17504716 | -2.15 | 0.0485 | Acemdu         | ACMUF-like 2                                                                                                                          |
| 17457913 | 1.8   | 0.0486 | Cion1          | chloride channel, voltage-sensitive 1                                                                                                 |
| 17454665 | -1.51 | 0.0486 | Gm266f         | predicted gene 2666, component of Sp100-2                                                                                             |
| 17334495 | 1.28  | 0.0489 | Nme3           | NME/NME3 nucleoside diphosphate kinase 3, mitochondrial ribosomal protein S34                                                         |
| 17344126 | -2.47 | 0.0489 | Hspa1b, Hspa1a | heat shock protein 1b, heat shock protein 1A                                                                                          |
| 17435189 | -1.47 | 0.049  | Ran115         | RAN115, family 11, member 8                                                                                                           |
| 17505325 | -1.9  | 0.049  | Hra4           | HRA serine peptidase 4                                                                                                                |
| 17481723 | -1.32 | 0.0491 | Sncd3          | small nuclear RNA, HNRCA box 23                                                                                                       |
| 17249840 | -1.36 | 0.0491 | Mcm9           | minichromosome maintenance complex component 9                                                                                        |
| 17428559 | -1.38 | 0.0491 | Nasp           | nuclear autoantigenic sperm protein (histone-binding)                                                                                 |
| 17446441 | 1.27  | 0.0492 | Hsdha          | hydroxyacyl-Coenzyme A dehydrogenase 3, ketosyl-Coenzyme A thiolase/methyl-Coenzyme A hydratase (bifunctional protein), alpha subunit |
| 17347353 | -1.53 | 0.0493 | Gmf548         | eukaryotic translation elongation factor 1 alpha 1 pseudogene                                                                         |
| 17262855 | -1.48 | 0.0493 | Tsp1           | Tsp-AP3 interacting protein 1                                                                                                         |
| 17392396 | 1.45  | 0.0494 | Barf2e         | barrier to autointegration factor 2, opposite strand                                                                                  |
| 17228991 | 1.53  | 0.0494 | Atf1a2         | ATPase, Na(+)-K(+)-transporting, alpha 2 polypeptide                                                                                  |
| 17463463 | 1.54  | 0.0496 | Sym2           | symplectic defective 1, Rho GTPase, homolog 2 (C. elegans)                                                                            |
| 17364948 | 1.39  | 0.0496 | Scl26w28       | solute carrier family 26, member 28                                                                                                   |
| 17334923 | -2.18 | 0.0496 | Hst1           | hairy and enhancer of split 1 (Drosophila)                                                                                            |
| 17549822 | -1.39 | 0.0496 |                |                                                                                                                                       |
| 17277697 | 1.29  | 0.0496 | Adck1          | adck domain containing kinase 1                                                                                                       |
| 17461414 | 1.39  | 0.0496 | Mps1p          | mitogen-activated protein kinase 1 interacting protein 1                                                                              |
| 17468172 | 1.28  | 0.0497 | Dauk           | dioxysaprosine kinase                                                                                                                 |
| 17535126 | -1.5  | 0.0498 | Rp16ck         | ribosomal protein S6 kinase polypeptide 3                                                                                             |
| 17283220 | -1.36 | 0.0499 | 2310058D17Rk   | RKEN cDNA 2310058D17 gene (Source: MGI Symbol Acc: MGI:1922844)                                                                       |
